# Supplementary material for: Diastereoselective β-hydroxy vinylsulfone isomerizations
Source: Royal Society of Chemistry journal article supplement (doi:10.1039/d4ob01781a), 2025-01-01
Supplement: d4ob01781a1.pdf [file d4ob01781a1.pdf]

## Supporting Information for:

### Diastereoselective $\beta$ -Hydroxy Vinylsulfone Isomerizations

G. W. O'Neil,\* T. D. Clark, A. P. Jones, C. Wallace, D. M. Carnahan, and H. Crockett

Department of Chemistry, Western Washington University, Bellingham, WA 98225 (USA)

\*Corresponding author. Email: [oneilg@wwu.edu](mailto:oneilg@wwu.edu)

#### Contents:

| <b>NMR Spectra for Compound:</b>                                                                    | <b>Page</b> |
|-----------------------------------------------------------------------------------------------------|-------------|
| ( <i>E</i> )-(Hex-1-en-1-ylsulfonyl)benzene ( <b>2</b> )                                            | S2          |
| ( <i>E</i> )-(Hex-2-en-1-ylsulfonyl)benzene ( <b>5</b> )                                            | S2          |
| ( <i>E</i> )-Triisopropyl((6-(phenylsulfonyl)hex-5-en-1-yl)oxy)silane                               | S3          |
| ( <i>E</i> )-7-(Phenylsulfonyl)dodec-7-en-6-ol ( <b>3</b> )                                         | S4          |
| ( <i>E</i> )-7-(Phenylsulfonyl)dodec-8-en-6-ol ( <b>4</b> )                                         | S5          |
| ( <i>E</i> )-2-Methyl-4-(phenylsulfonyl)non-4-en-3-ol ( <b>6</b> )                                  | S6          |
| ( <i>E</i> )-Triethyl((2-methyl-4-(phenylsulfonyl)non-4-en-3-yl)oxy)silane ( <b>6-Si</b> )          | S7          |
| ( <i>E</i> )-2-Methyl-4-(phenylsulfonyl)non-4-en-3-yl acetate ( <b>6-Ac</b> )                       | S8          |
| ( <i>E</i> )-2-Methyl-4-(phenylsulfonyl)non-5-en-3-ol ( <b>7</b> )                                  | S9          |
| ( <i>E</i> )-3-(Phenylsulfonyl)oct-3-en-2-ol ( <b>8v</b> )                                          | S10         |
| ( <i>E</i> )-3-(Phenylsulfonyl)oct-4-en-2-ol ( <b>8a</b> )                                          | S11         |
| ( <i>E</i> )-2-Methyl-5-(phenylsulfonyl)dec-5-en-4-ol ( <b>9v</b> )                                 | S12         |
| ( <i>E</i> )-2-Methyl-5-(phenylsulfonyl)dec-6-en-4-ol ( <b>9a</b> )                                 | S13         |
| ( <i>E</i> )-2,2-Dimethyl-4-(phenylsulfonyl)non-4-en-3-ol ( <b>10v</b> )                            | S14         |
| ( <i>E</i> )-2,2-Dimethyl-4-(phenylsulfonyl)non-5-en-3-ol ( <b>10a</b> )                            | S15         |
| ( <i>E</i> )-1-Phenyl-2-(phenylsulfonyl)hept-2-en-1-ol ( <b>11v</b> )                               | S16         |
| ( <i>E</i> )-2-Methyl-4-(phenylsulfonyl)-9-((triisopropylsilyl)oxy)non-4-en-3-ol ( <b>12v</b> )     | S17         |
| ( <i>E</i> )-2-Methyl-4-(phenylsulfonyl)-9-((triisopropylsilyl)oxy)non-5-en-3-ol ( <b>12a</b> )     | S18         |
| ( <i>E</i> )-2,2-Dimethyl-4-(phenylsulfonyl)-9-((triisopropylsilyl)oxy)non-4-en-3-ol ( <b>13v</b> ) | S19         |
| ( <i>E</i> )-2,2-Dimethyl-4-(phenylsulfonyl)-9-((triisopropylsilyl)oxy)non-5-en-3-ol ( <b>13a</b> ) | S20         |
| ( <i>E</i> )-2-Methyl-7-phenyl-4-(phenylsulfonyl)hept-4-en-3-ol ( <b>14v</b> )                      | S21         |
| ( <i>E</i> )-2-Methyl-7-phenyl-4-(phenylsulfonyl)hept-5-en-3-ol ( <b>14a</b> )                      | S22         |
| ( <i>E</i> )-2,6-Dimethyl-4-(phenylsulfonyl)hept-4-en-3-ol ( <b>15</b> )                            | S23         |
| ((3 <i>Z</i> ,5 <i>E</i> )-2-Methylnona-3,5-dien-4-yl)(phenylperoxy)sulfane ( <b>17</b> )           | S24         |
|                                                                                                     |             |
| <b>Figure S1.</b> Comparison of crude product mixtures by <sup>1</sup> H NMR.                       | S27         |
| <b>Table S1.</b> Comparison of <sup>1</sup> H NMR coupling constants for stereochemical analysis.   | S27         |

WEC-WA-007F13.1

2.22  
2.19  
2.20  
2.20  
2.20  
2.19  
2.19  
2.18  
2.18  
2.17  
2.17  
1.42  
1.41  
1.40  
1.39  
1.39  
1.39  
1.39  
1.38  
1.38  
1.36  
1.36  
1.29  
1.28  
1.28  
1.27  
1.26  
1.25  
0.85  
0.84  
0.82

<sup>1</sup>H NMR spectrum (CDCl<sub>3</sub>, 500 MHz)

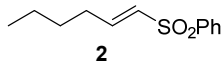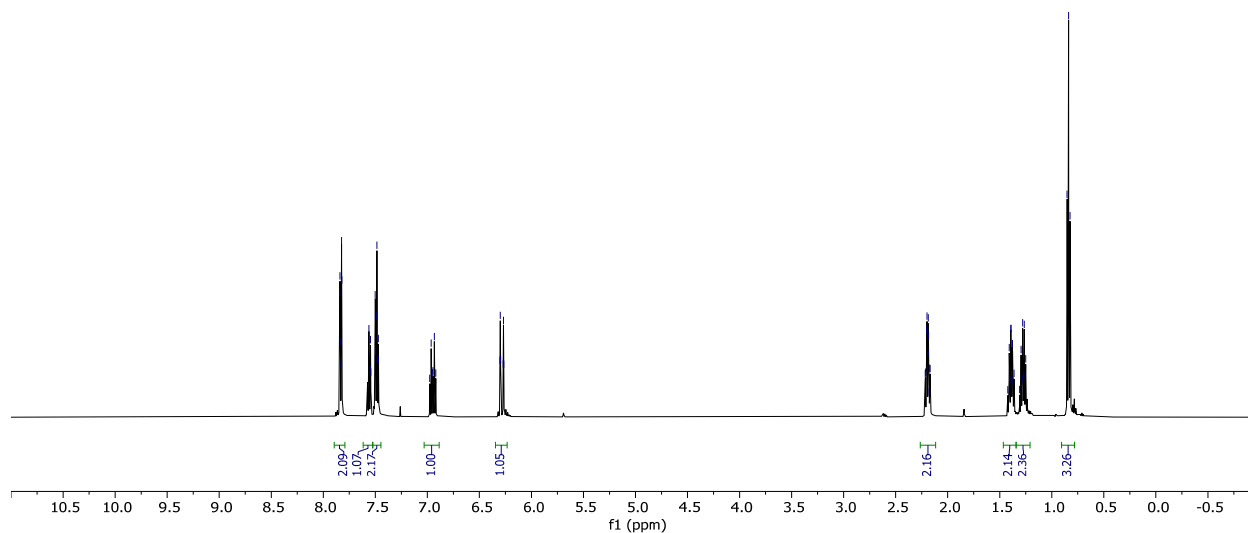

7.53  
7.53  
7.53  
7.26  
5.73  
5.71  
5.71  
5.42  
5.42  
5.49  
5.49  
5.48  
5.47  
5.43  
5.43  
5.42  
5.42  
5.41  
5.41  
5.41  
5.40  
5.40  
5.38  
3.86  
3.85  
3.84  
3.75  
3.74  
3.74  
3.74  
1.99  
1.98  
1.97  
1.96  
1.96  
1.96  
1.95  
1.95  
1.94  
1.93  
1.73  
1.72  
1.72  
1.71  
1.70  
1.69  
1.69  
1.30  
1.29  
1.27  
1.26  
1.26  
1.17  
1.17  
1.16  
1.14  
1.13  
0.85  
0.85  
0.80  
0.76  
0.75

<sup>1</sup>H NMR spectrum (CDCl<sub>3</sub>, 500 MHz)

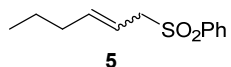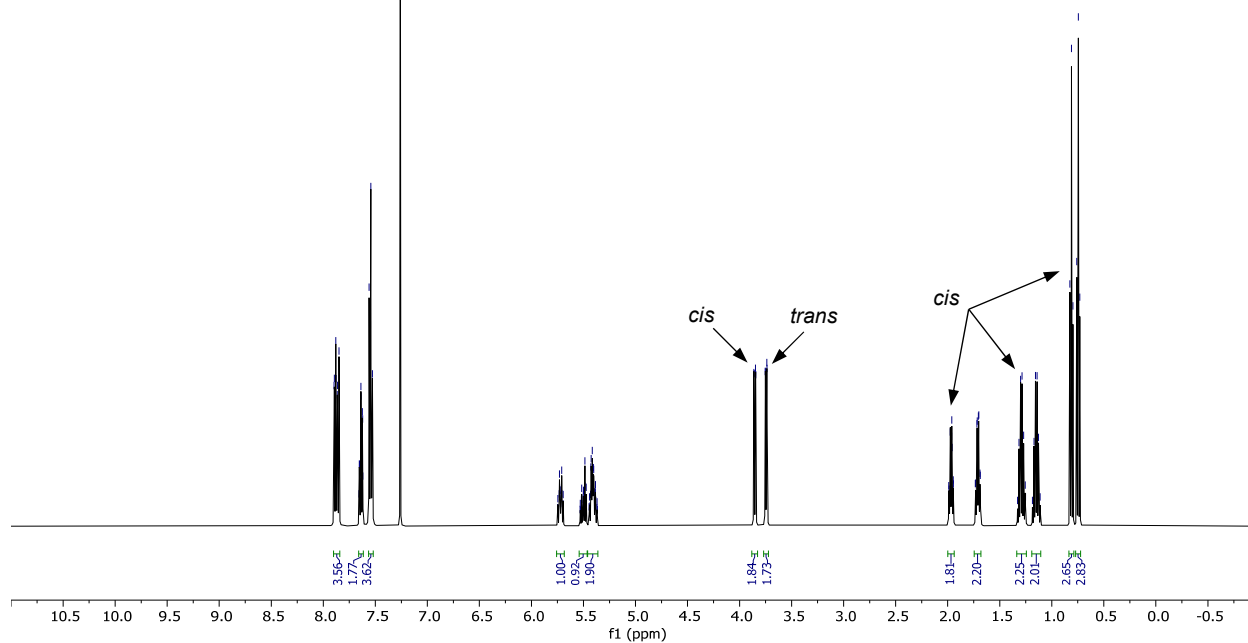

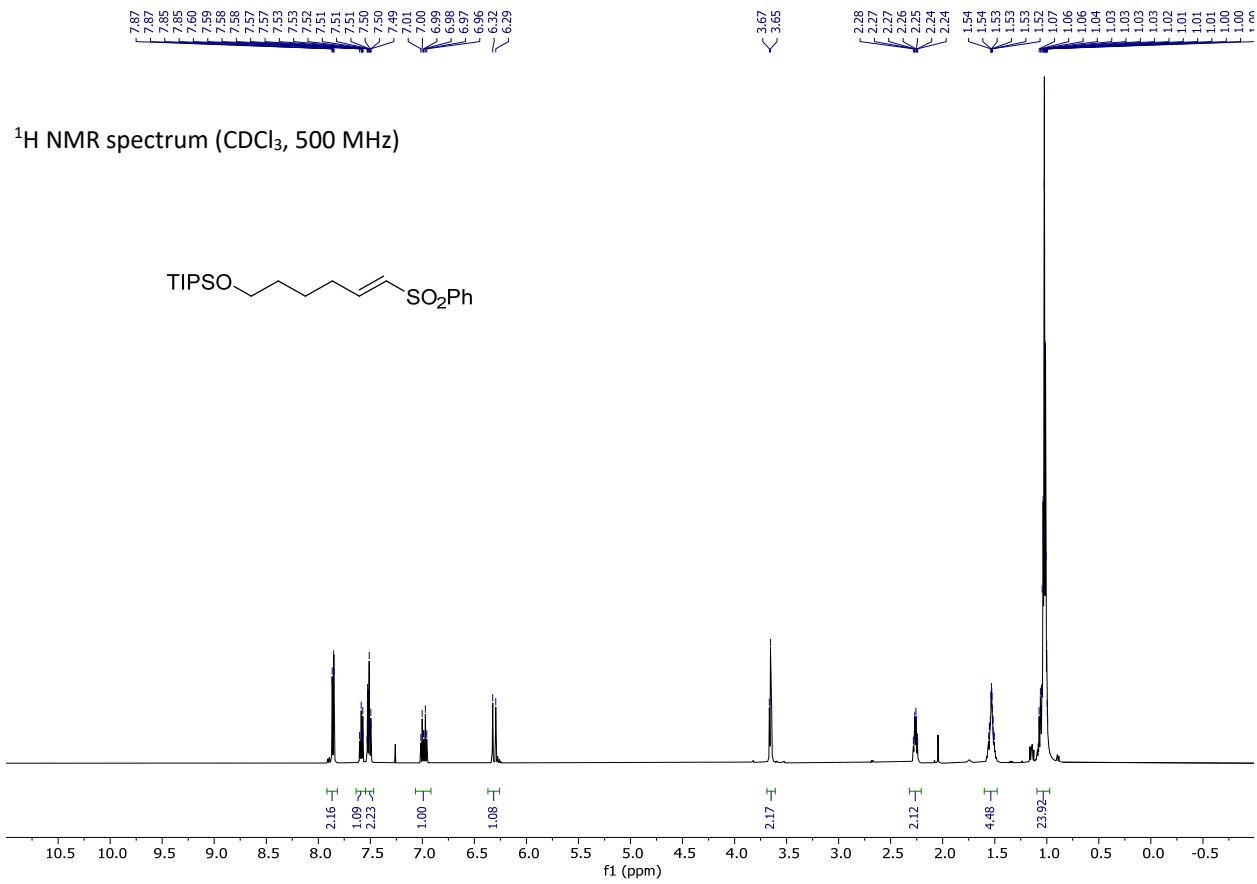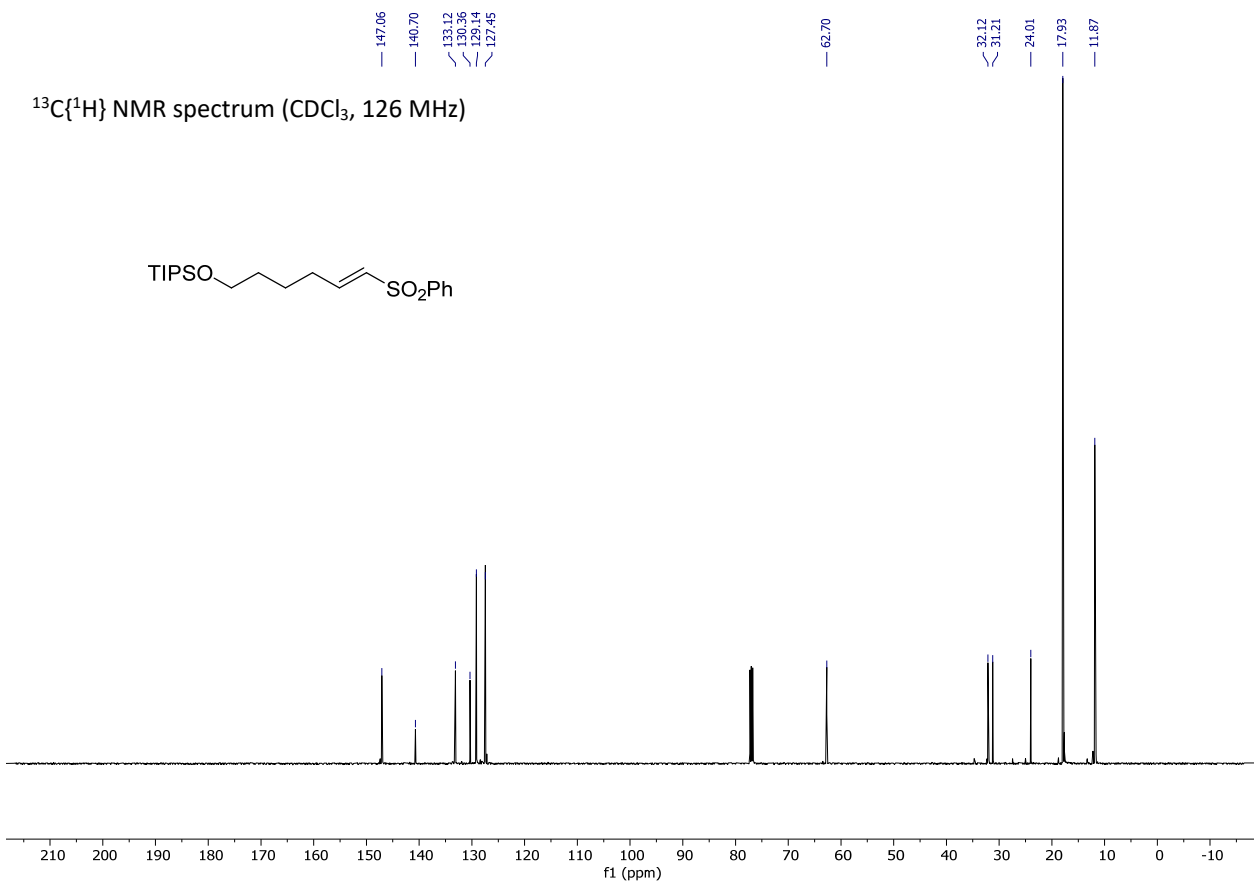

$^1\text{H}$  NMR spectrum ( $\text{CDCl}_3$ , 500 MHz)

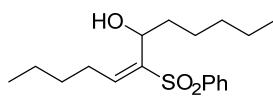

**3**

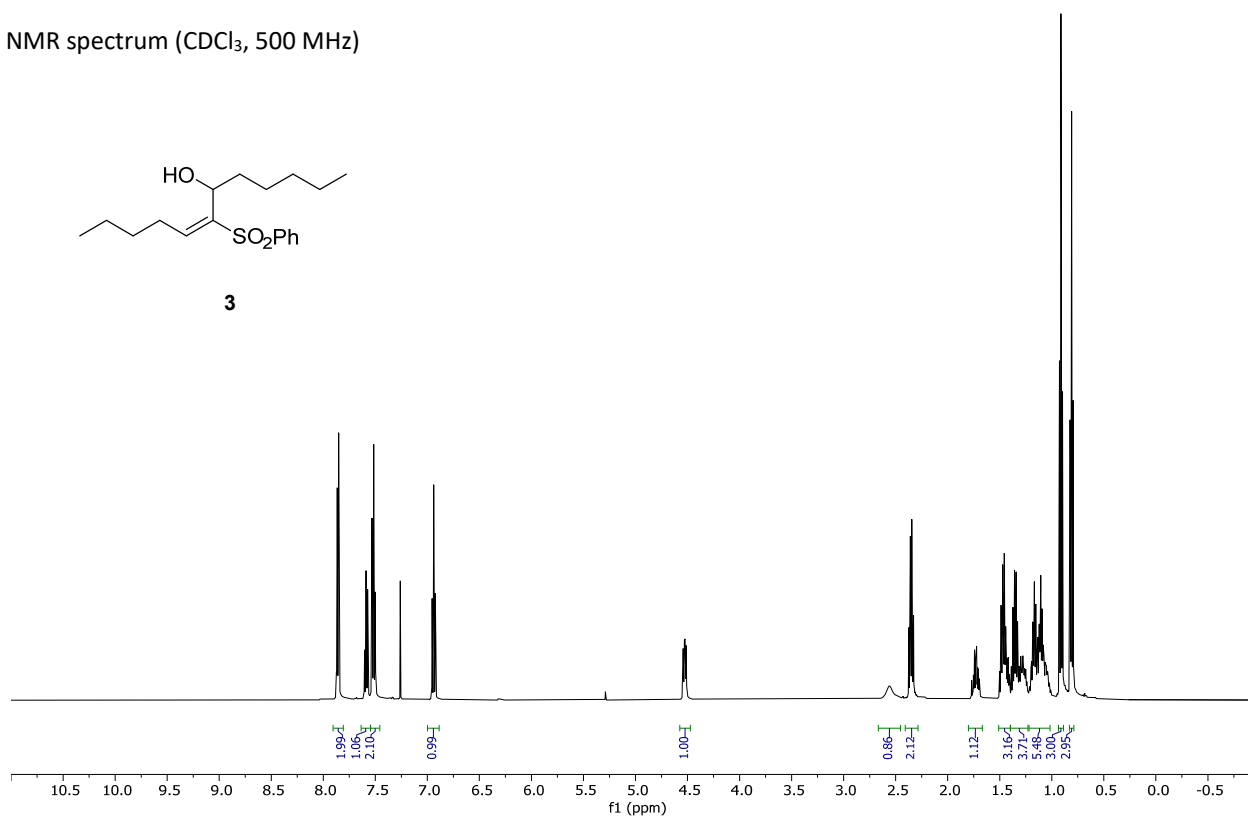

$^{13}\text{C}\{^1\text{H}\}$  NMR spectrum ( $\text{CDCl}_3$ , 126 MHz)

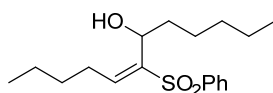

**3**

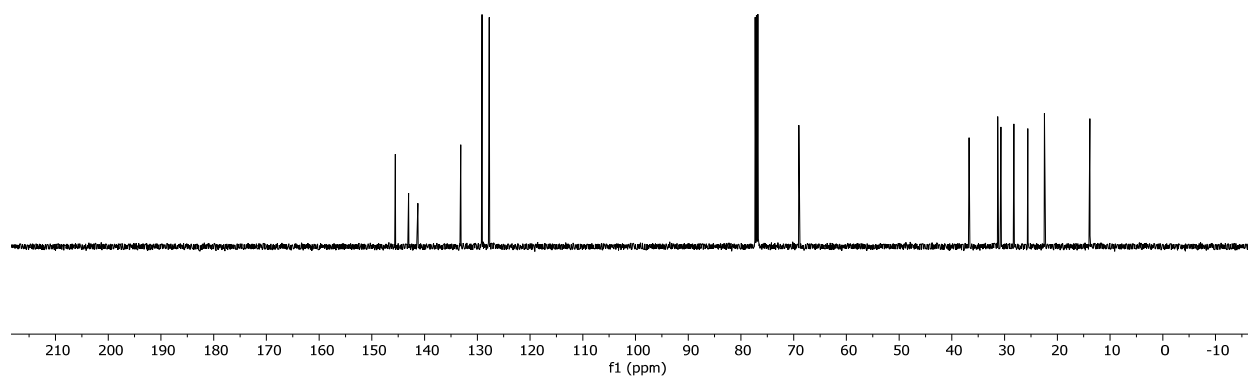



OLG-05-03-22-11  
after FCC

4.13  
4.12  
4.11  
4.10  
2.76  
2.75  
2.74  
2.54  
2.52  
2.31  
2.29  
2.03  
2.02  
2.01  
2.00  
1.99  
1.98  
1.46  
1.45  
1.44  
1.43  
1.41  
1.35  
1.33  
1.32  
1.32  
1.30  
1.01  
0.99  
0.87  
0.85  
0.84

<sup>1</sup>H NMR spectrum (CDCl<sub>3</sub>, 500 MHz)

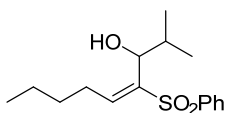

6

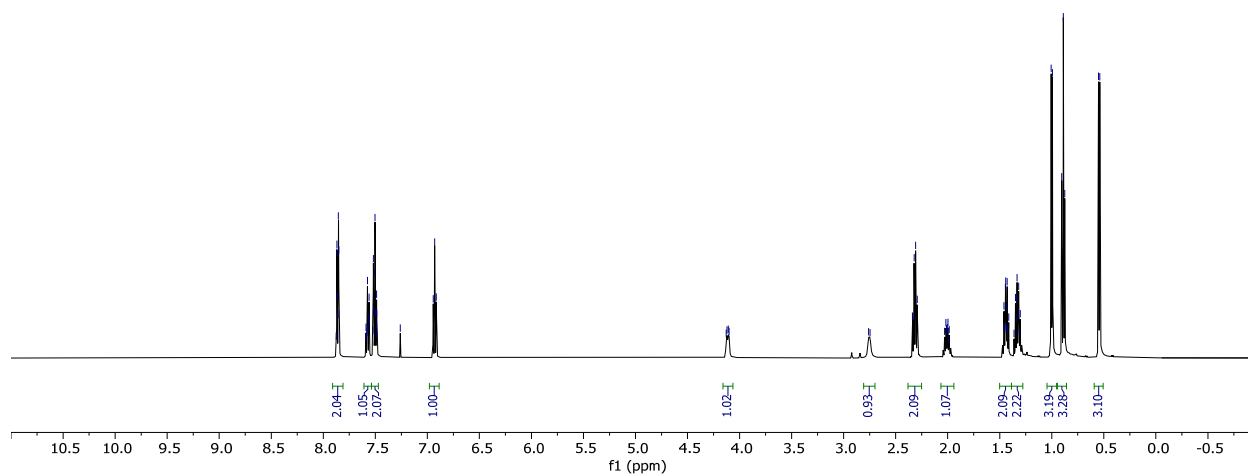

146.52  
142.42  
141.30  
132.08  
128.02  
127.74

74.87

33.23  
30.53  
28.36  
22.33  
19.36  
18.86  
13.72

<sup>13</sup>C{<sup>1</sup>H} NMR spectrum (CDCl<sub>3</sub>, 126 MHz)

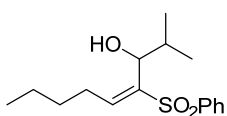

6

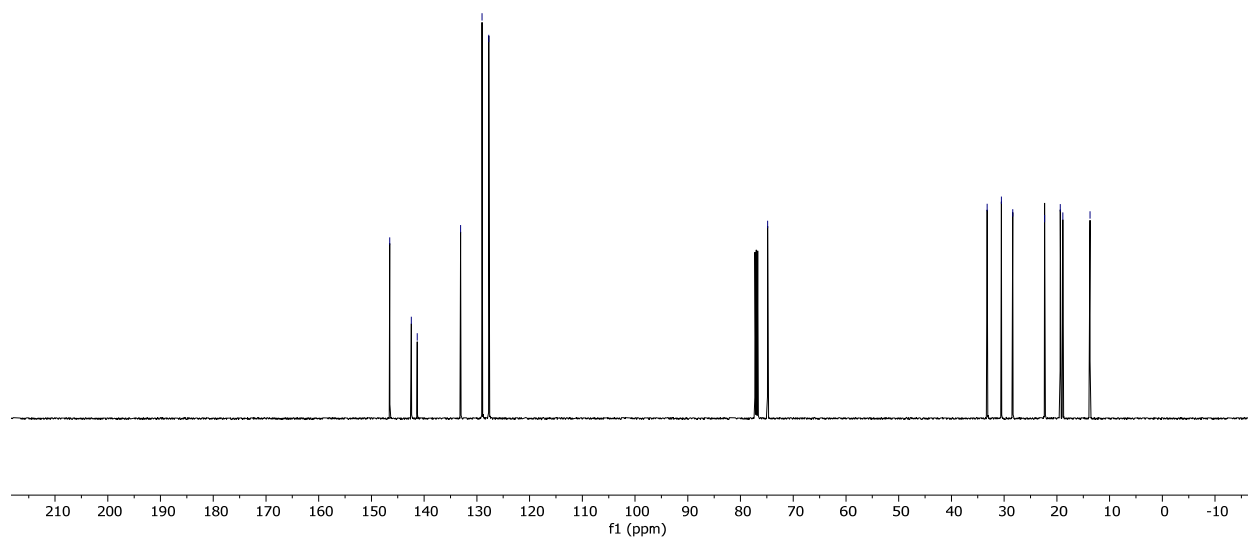

7.88  
7.87  
7.86  
7.81  
7.61  
7.60  
7.59  
7.58  
7.57  
7.53  
7.52  
7.51  
7.50  
7.46  
7.02  
6.99  
6.99  
4.79  
4.27  
2.48  
2.47  
2.13  
2.12  
2.11  
2.10  
2.10  
2.09  
2.09  
2.08  
1.48  
1.47  
1.47  
1.46  
1.46  
1.45  
1.45  
1.44  
1.44  
1.44  
1.43  
1.43  
1.42  
1.42  
1.41  
1.41  
1.41  
1.40  
1.40  
1.39  
1.38  
1.38  
1.37  
1.37  
1.36  
1.35  
1.35  
1.34  
1.34  
0.89  
0.89  
0.91  
0.90  
0.89  
0.80  
0.80  
0.78  
0.78  
0.76  
0.76  
0.70  
0.70  
0.27  
0.27  
-0.00

<sup>1</sup>H NMR spectrum (CDCl<sub>3</sub>, 500 MHz)

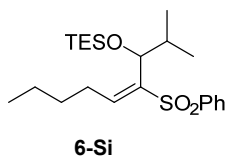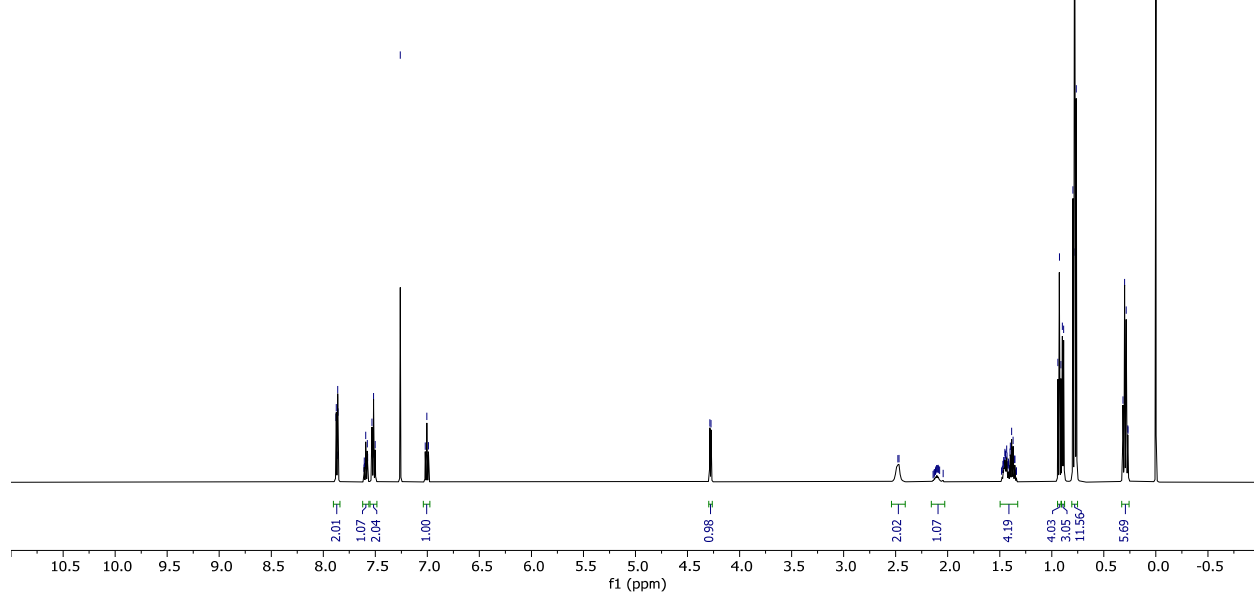

<sup>13</sup>C{<sup>1</sup>H} NMR spectrum (CDCl<sub>3</sub>, 126 MHz)

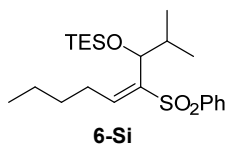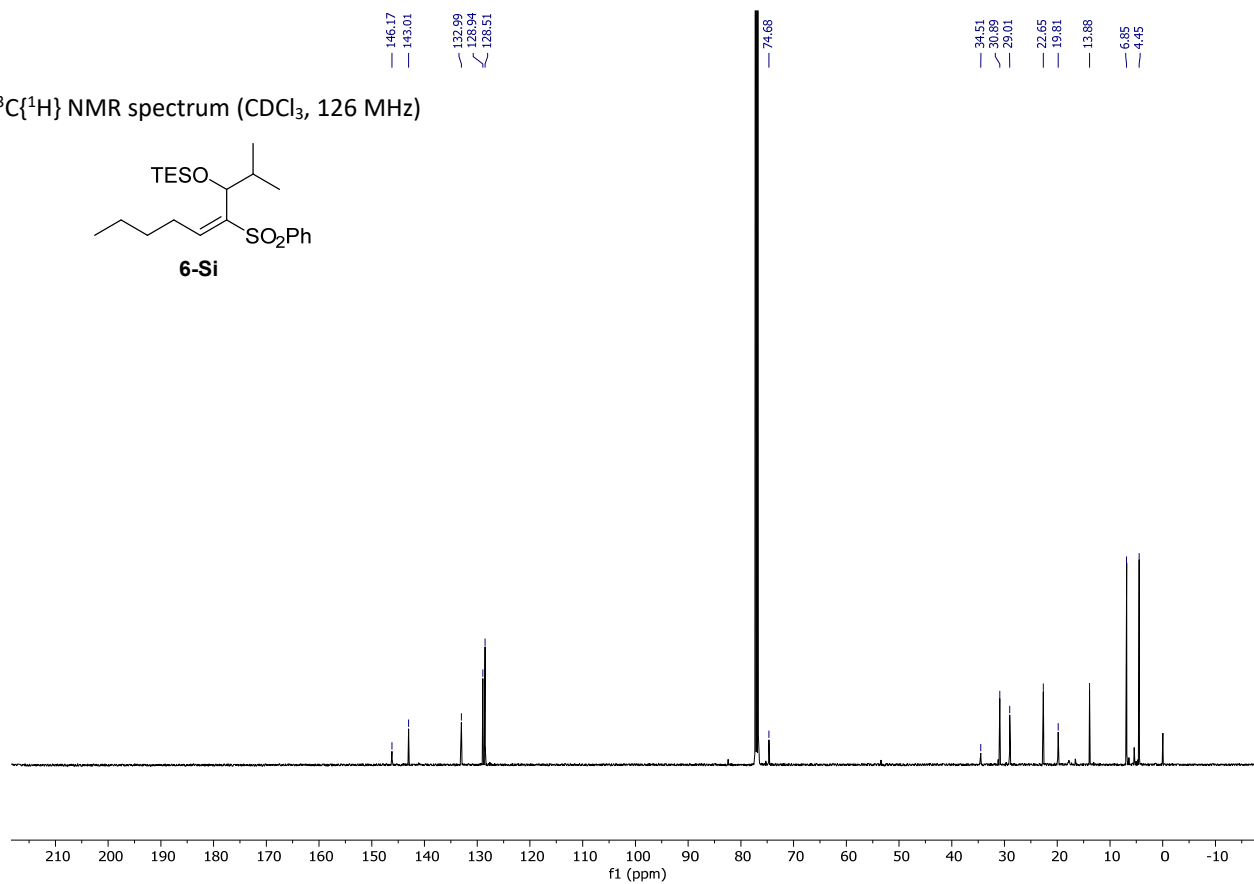





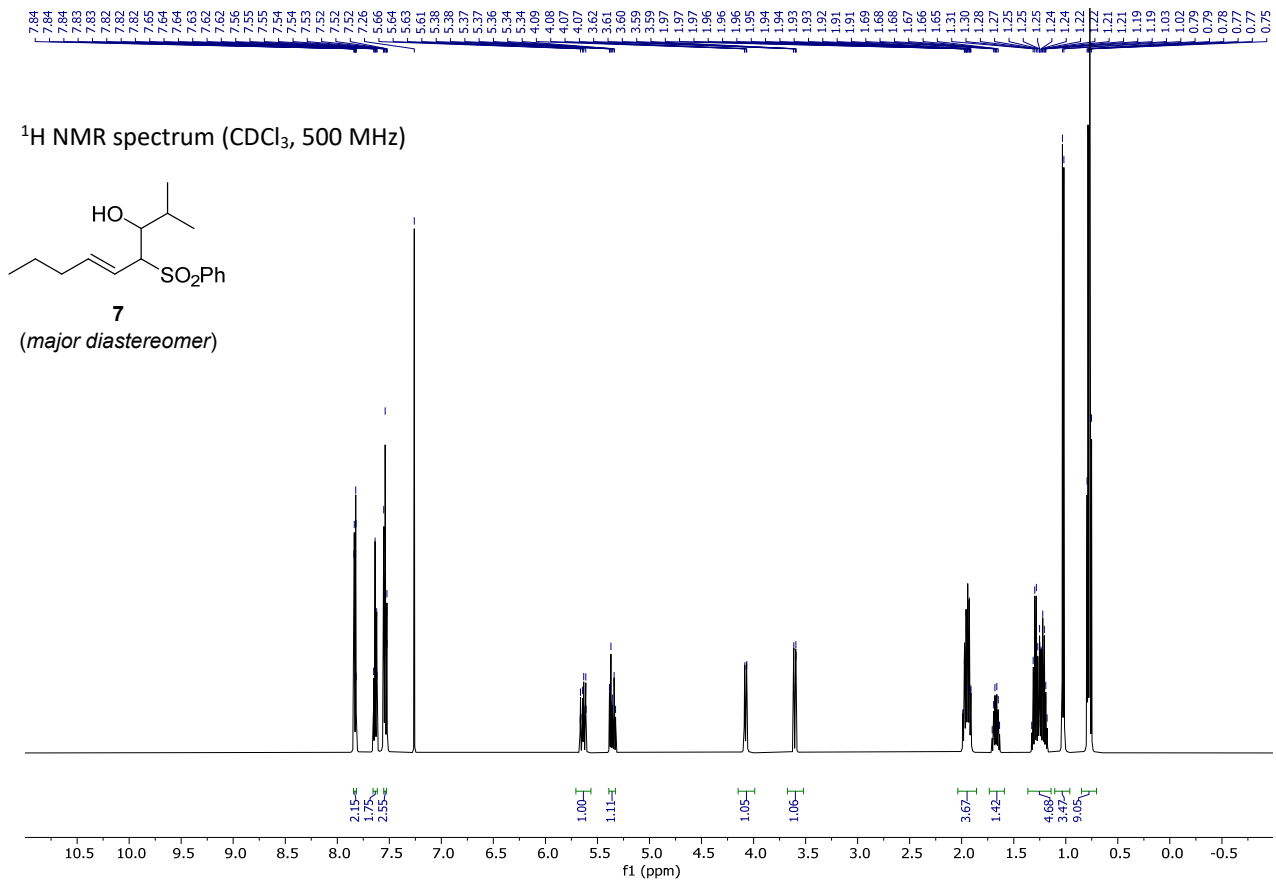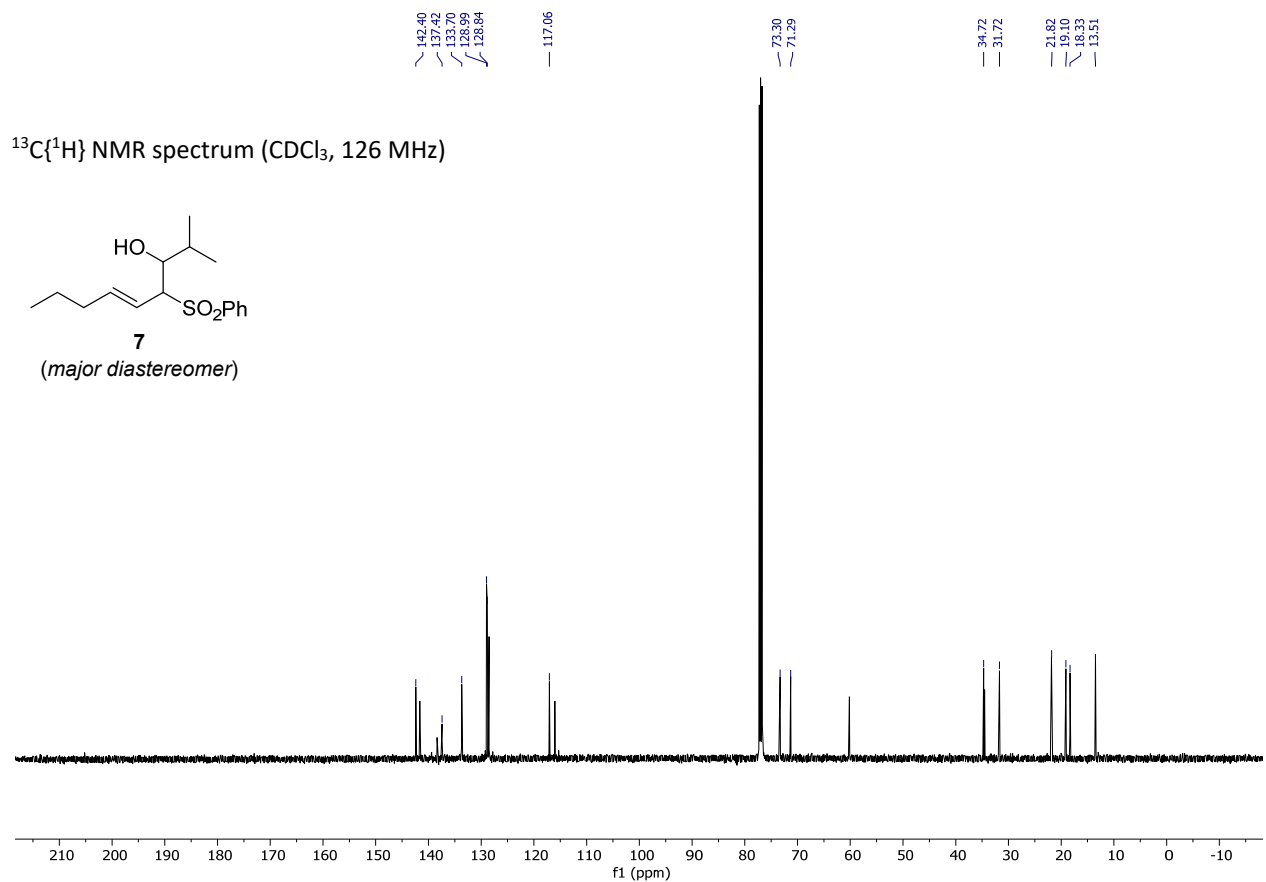

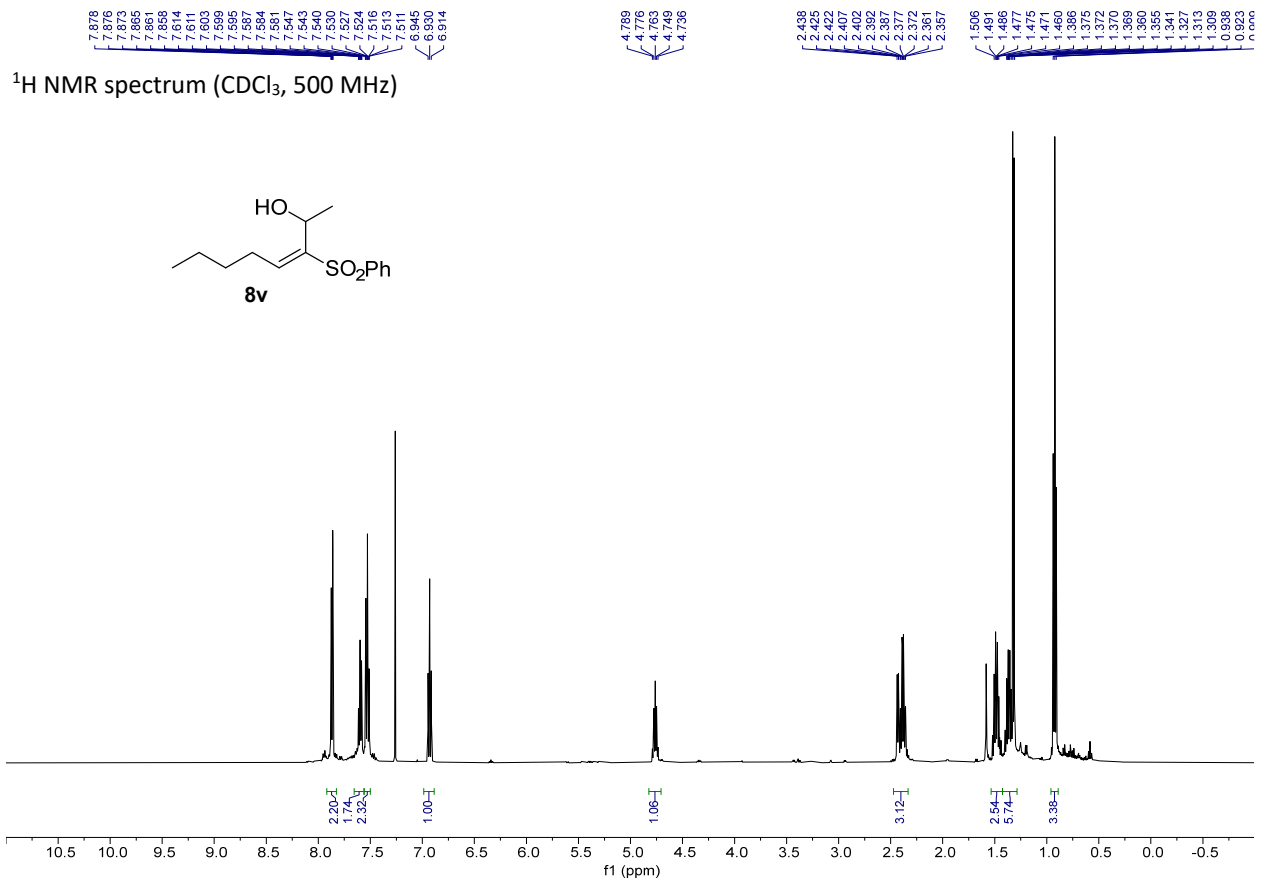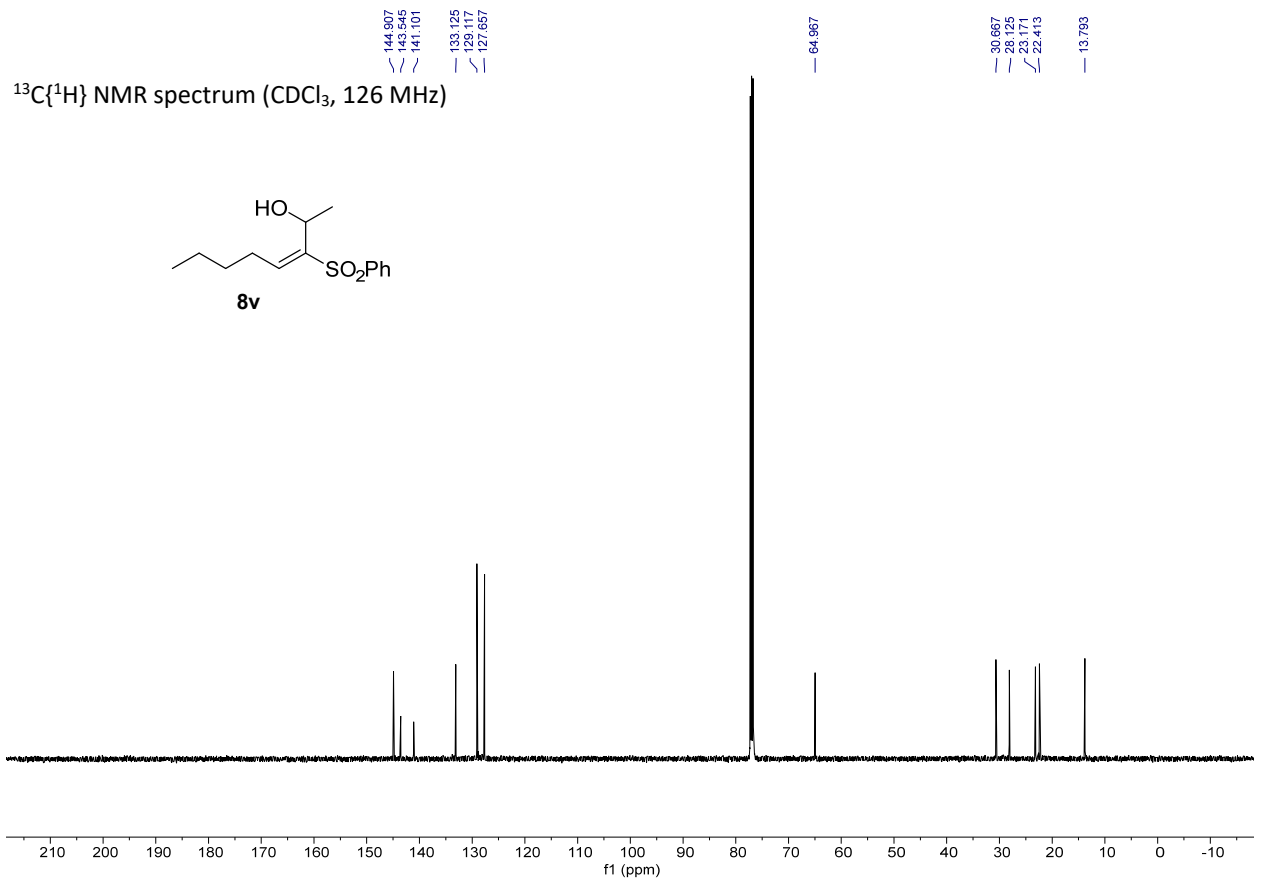

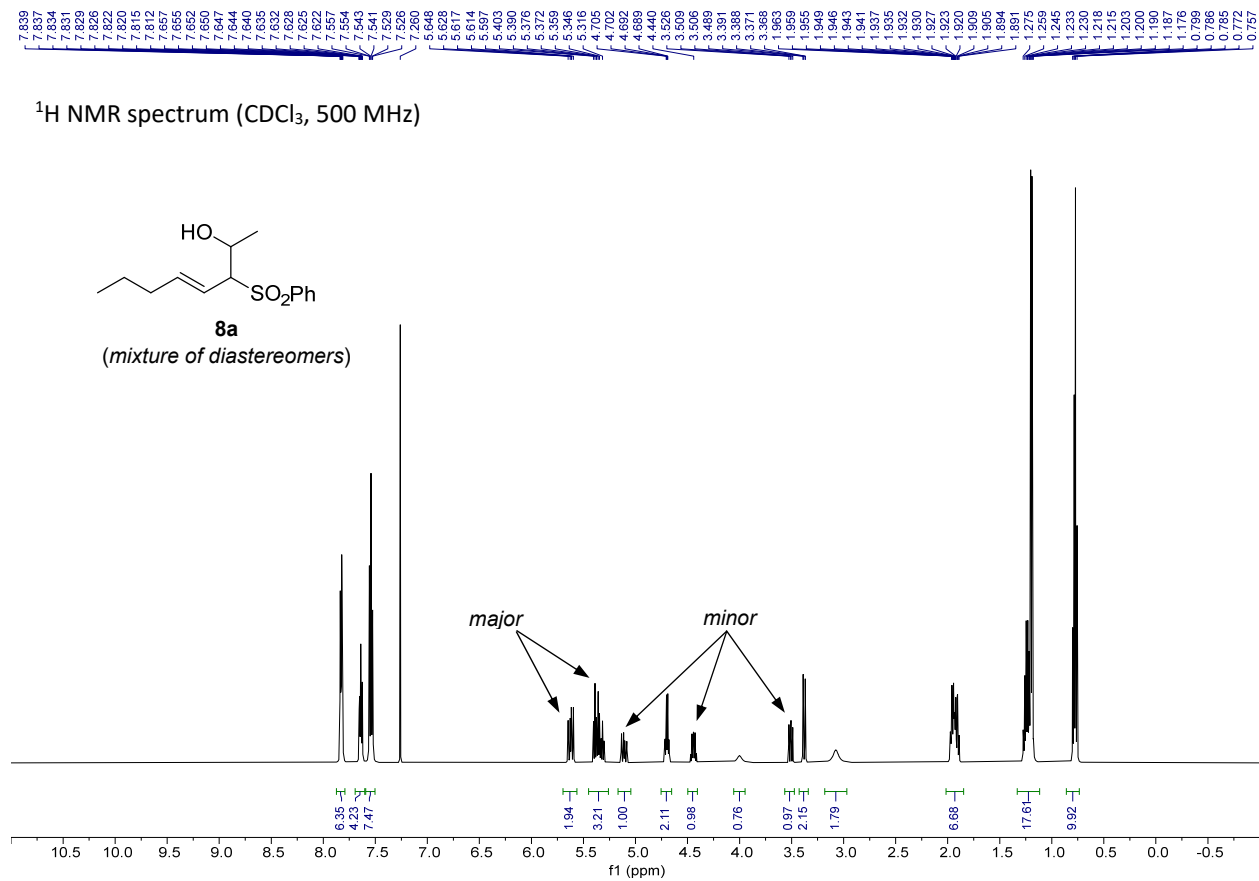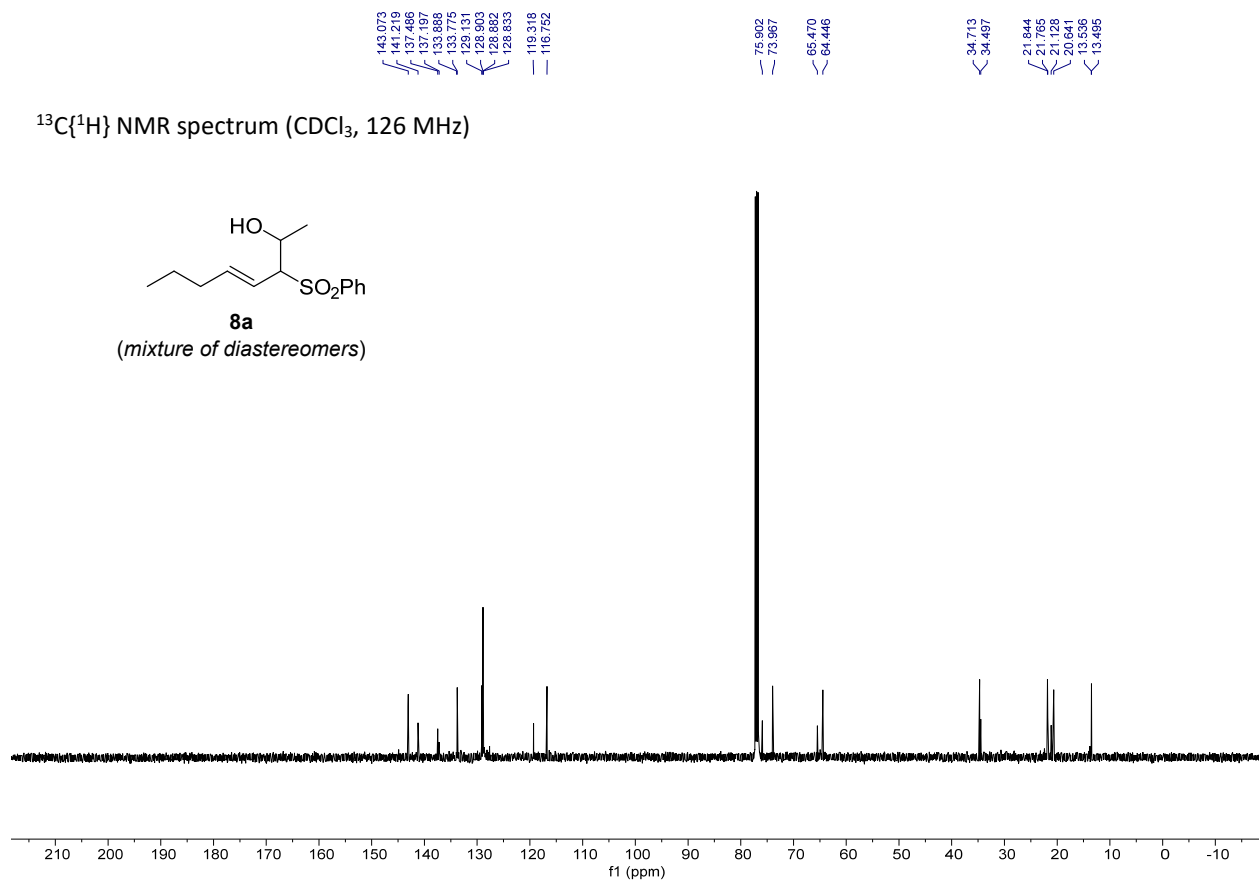

7.86  
7.85  
7.85  
7.84  
7.84  
7.60  
7.59  
7.59  
7.58  
7.58  
7.57  
7.57  
7.56  
7.53  
7.52  
7.52  
7.51  
7.51  
7.50  
7.50  
7.49  
7.49  
7.49  
6.91  
6.90  
4.62  
4.61  
4.60  
2.38  
2.37  
2.37  
2.36  
2.36  
2.34  
2.34  
2.33  
2.33  
1.75  
1.74  
1.74  
1.72  
1.72  
1.71  
1.70  
1.69  
1.61  
1.61  
1.60  
1.60  
1.59  
1.58  
1.58  
1.48  
1.47  
1.46  
1.46  
1.45  
1.45  
1.45  
1.44  
1.44  
1.37  
1.37  
1.36  
1.36  
1.35  
1.35  
1.34  
1.34  
1.33  
1.33  
1.16  
1.16  
1.15  
1.15  
1.14  
1.14  
1.13  
1.13  
1.12  
1.12  
1.11  
1.11  
0.92  
0.92  
0.88  
0.88  
0.81  
0.81  
0.74  
0.74

$^1\text{H}$  NMR spectrum ( $\text{CDCl}_3$ , 500 MHz)

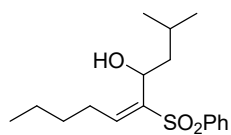

**9v**

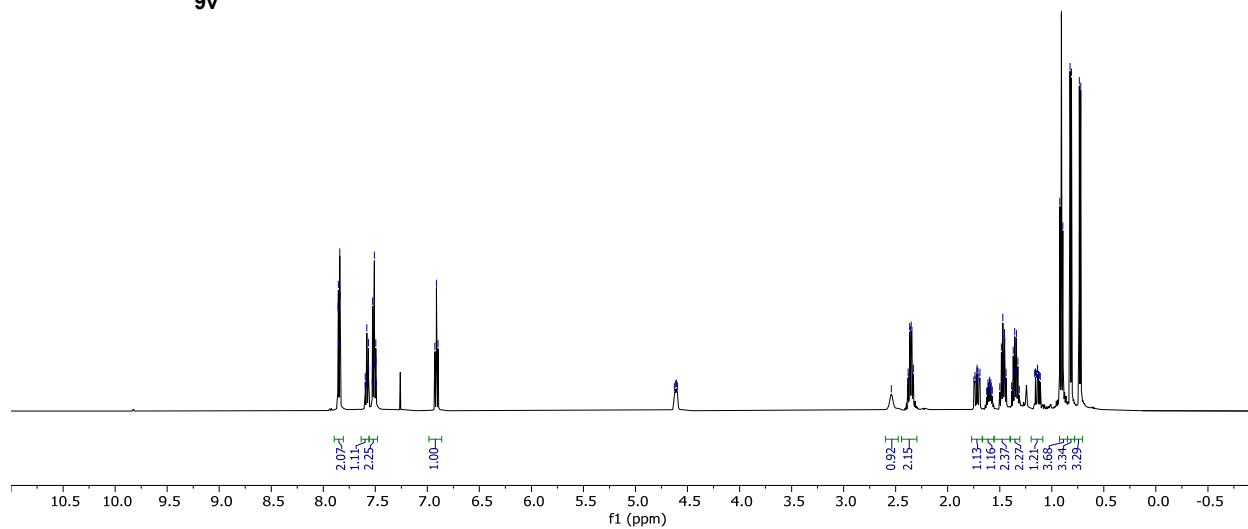

145.08  
143.33  
141.10  
132.07  
128.05  
127.67  
67.02  
45.68  
30.62  
28.74  
24.54  
23.13  
22.35  
21.31  
13.75

$^{13}\text{C}\{^1\text{H}\}$  NMR spectrum ( $\text{CDCl}_3$ , 126 MHz)

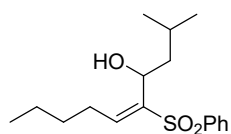

**9v**

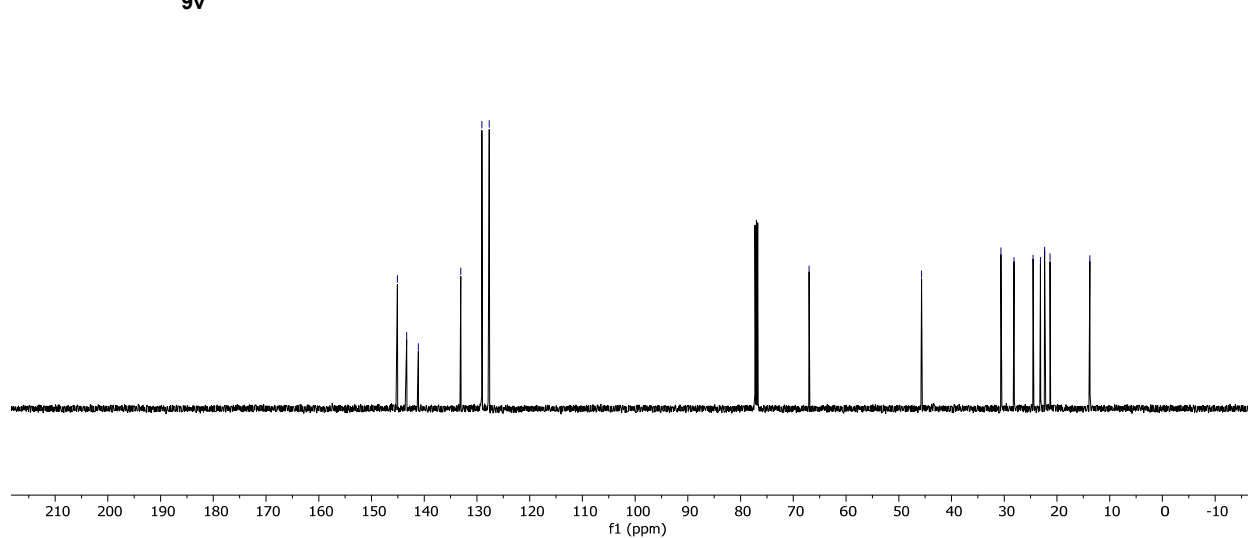

7.84  
7.84  
7.82  
7.82  
7.84  
7.64  
7.63  
7.62  
7.56  
7.54  
7.54  
7.54  
7.53  
7.52  
7.26  
5.65  
5.63  
5.62  
5.60  
5.35  
5.34  
5.32  
4.62  
4.61  
4.61  
3.39  
3.37  
3.37  
3.37  
1.96  
1.96  
1.95  
1.95  
1.94  
1.94  
1.83  
1.83  
1.83  
1.92  
1.91  
1.74  
1.74  
1.74  
1.54  
1.53  
1.51  
1.51  
1.50  
1.50  
1.48  
1.48  
1.48  
1.45  
1.23  
1.23  
1.22  
1.20  
1.19  
1.12  
1.11  
1.09  
1.09  
1.08  
1.07  
0.90  
0.89  
0.88  
0.87  
0.78  
0.77  
0.77  
0.76  
0.75  
0.75

$^1\text{H}$  NMR spectrum ( $\text{CDCl}_3$ , 500 MHz)

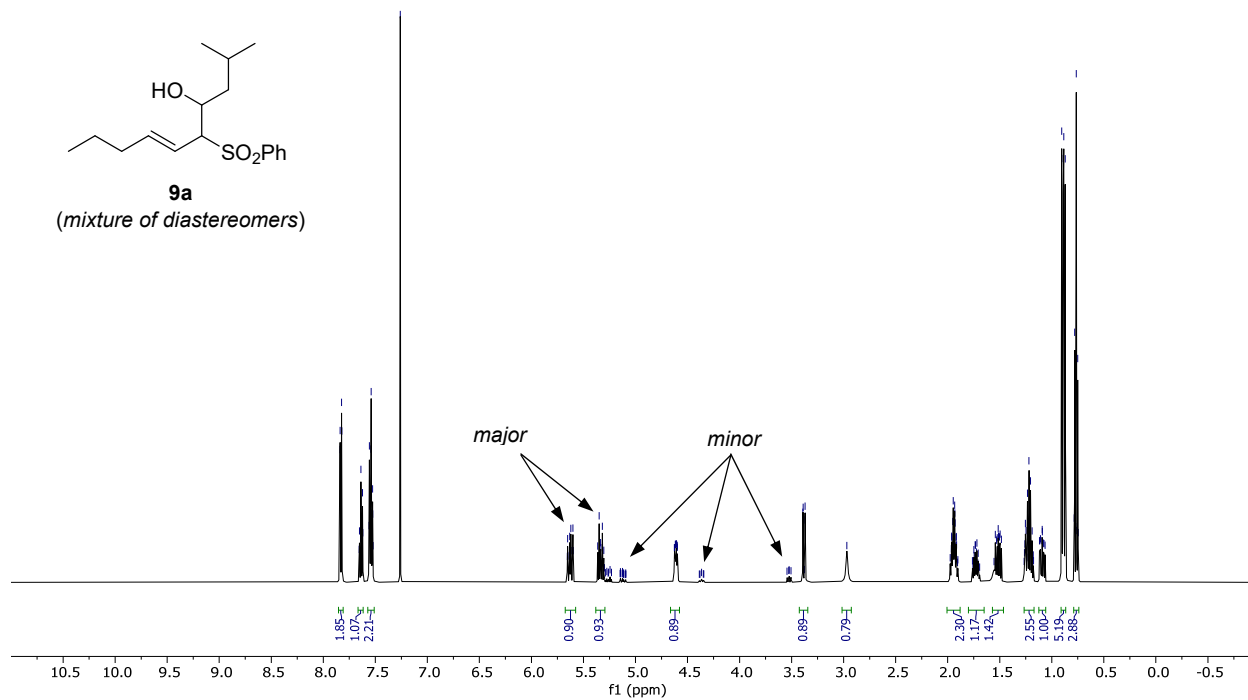

$^{13}\text{C}\{^1\text{H}\}$  NMR spectrum ( $\text{CDCl}_3$ , 126 MHz)

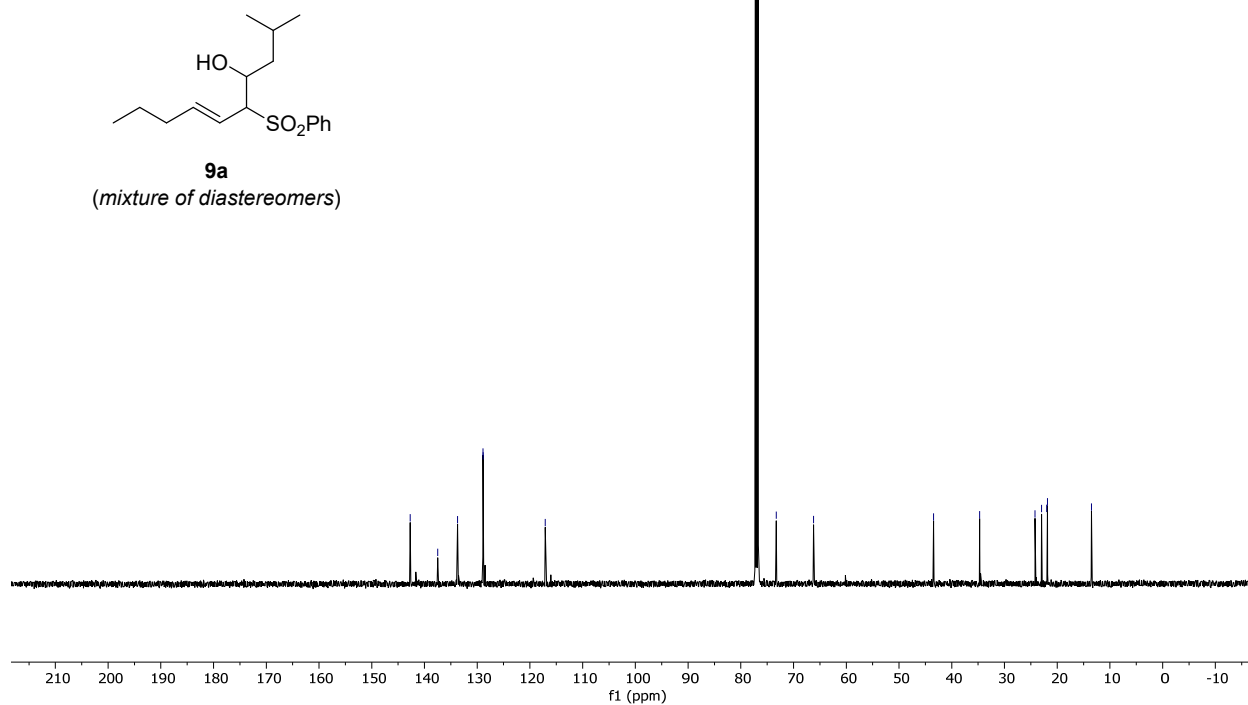

CKT-CA-085.5.fid  
Fractions 9-12 C13

4.412  
4.394  
2.294  
2.278  
2.262  
2.233  
1.387  
1.383  
1.373  
1.370  
1.366  
1.361  
1.358  
1.356  
1.354  
1.347  
1.345  
1.341  
1.331  
1.327  
1.319  
1.316  
1.305  
1.302  
1.290  
1.285  
1.271  
1.257  
1.244  
1.242  
1.229  
1.214  
1.200  
1.185  
1.179  
1.024  
1.020  
0.845  
0.831  
0.816

$^1\text{H}$  NMR spectrum ( $\text{CDCl}_3$ , 500 MHz)

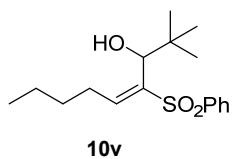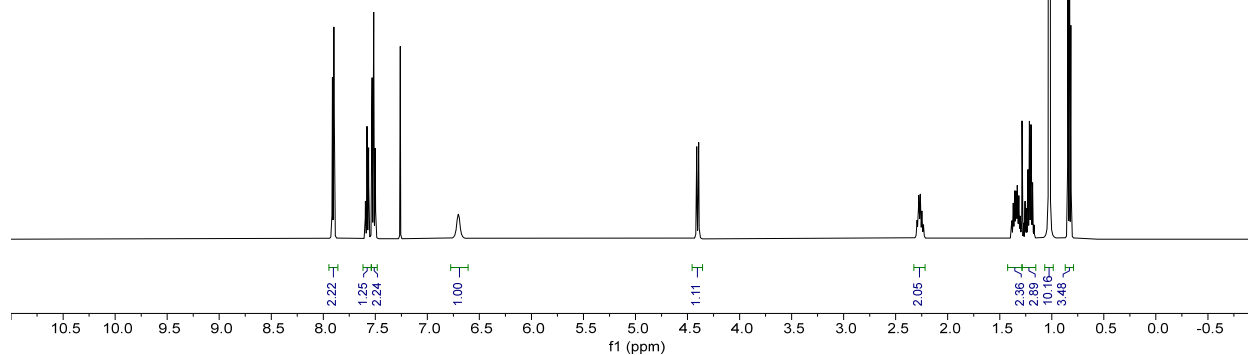

CKT-CA-085.5.fid  
Fractions 9-12 C13

148.804  
143.026  
132.693  
128.893  
127.417

37.655  
30.538  
29.672  
28.899  
22.233  
13.694

$^{13}\text{C}\{^1\text{H}\}$  NMR spectrum ( $\text{CDCl}_3$ , 126 MHz)

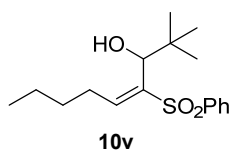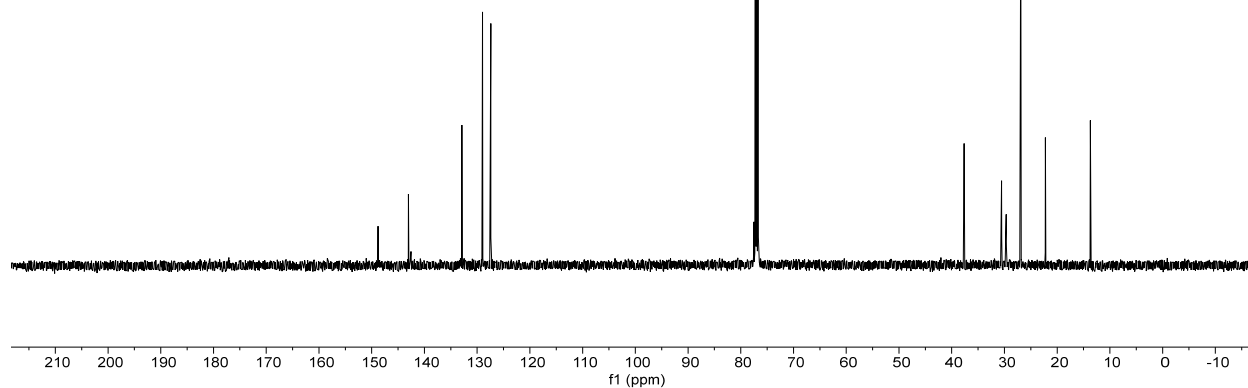

CKT-CA-086.5.fid  
Fraction 9

$^1\text{H}$  NMR spectrum ( $\text{CDCl}_3$ , 500 MHz)

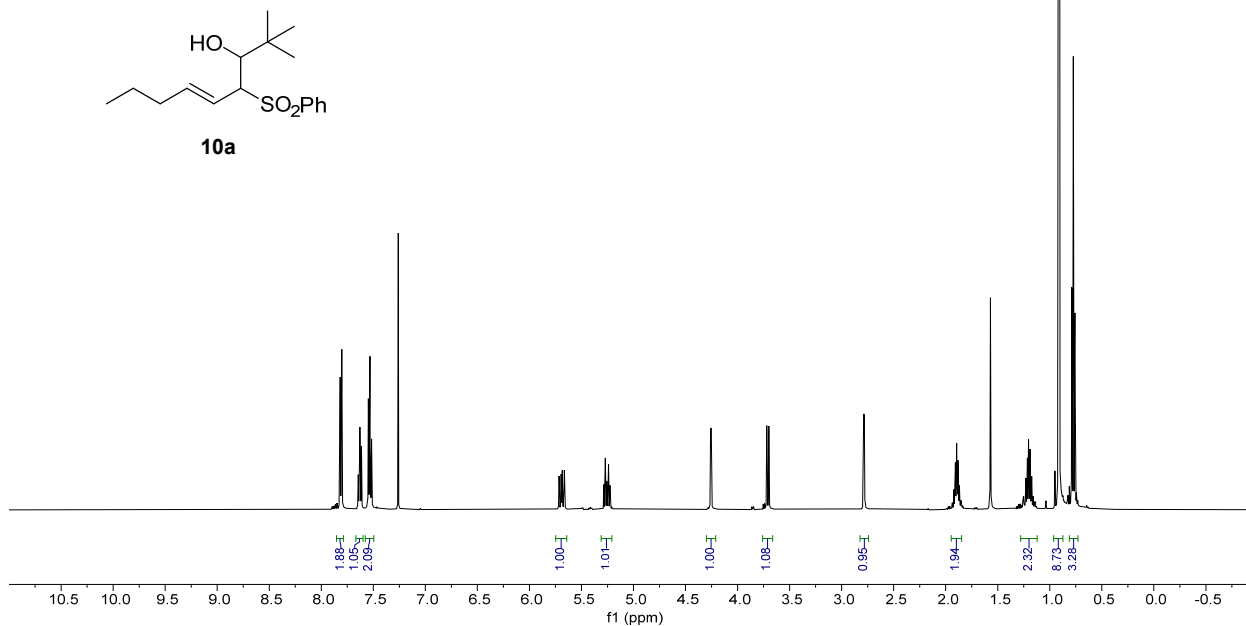

CKT-CA-086.5.fid  
Fraction 9 C13

$^{13}\text{C}\{^1\text{H}\}$  NMR spectrum ( $\text{CDCl}_3$ , 126 MHz)

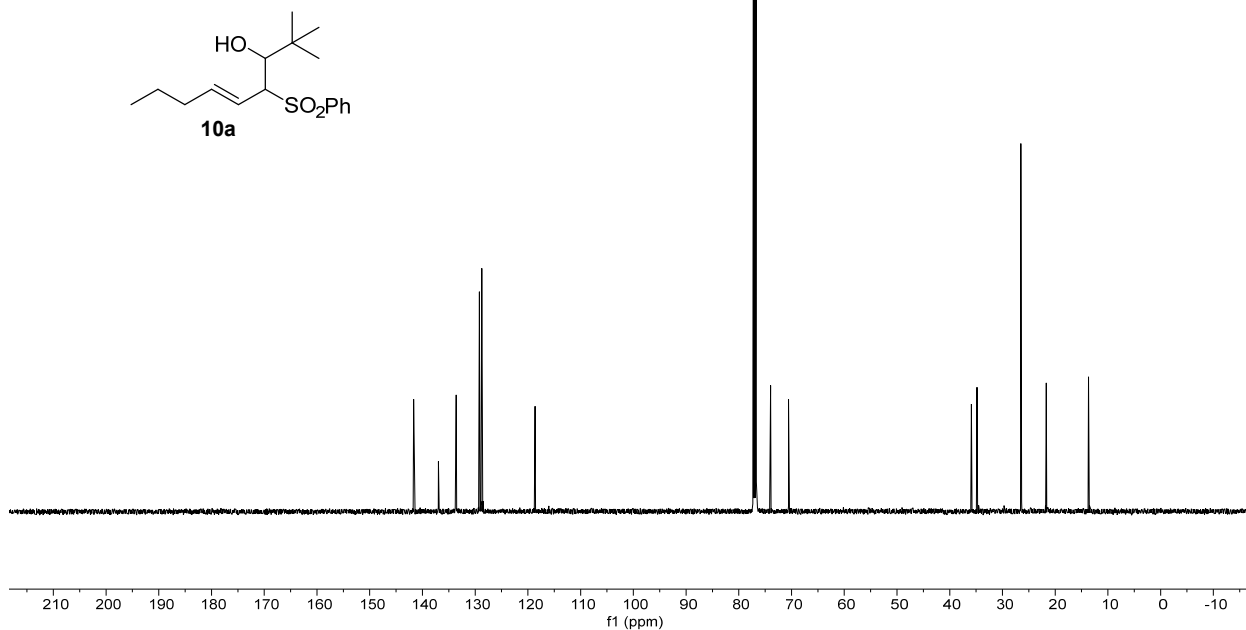

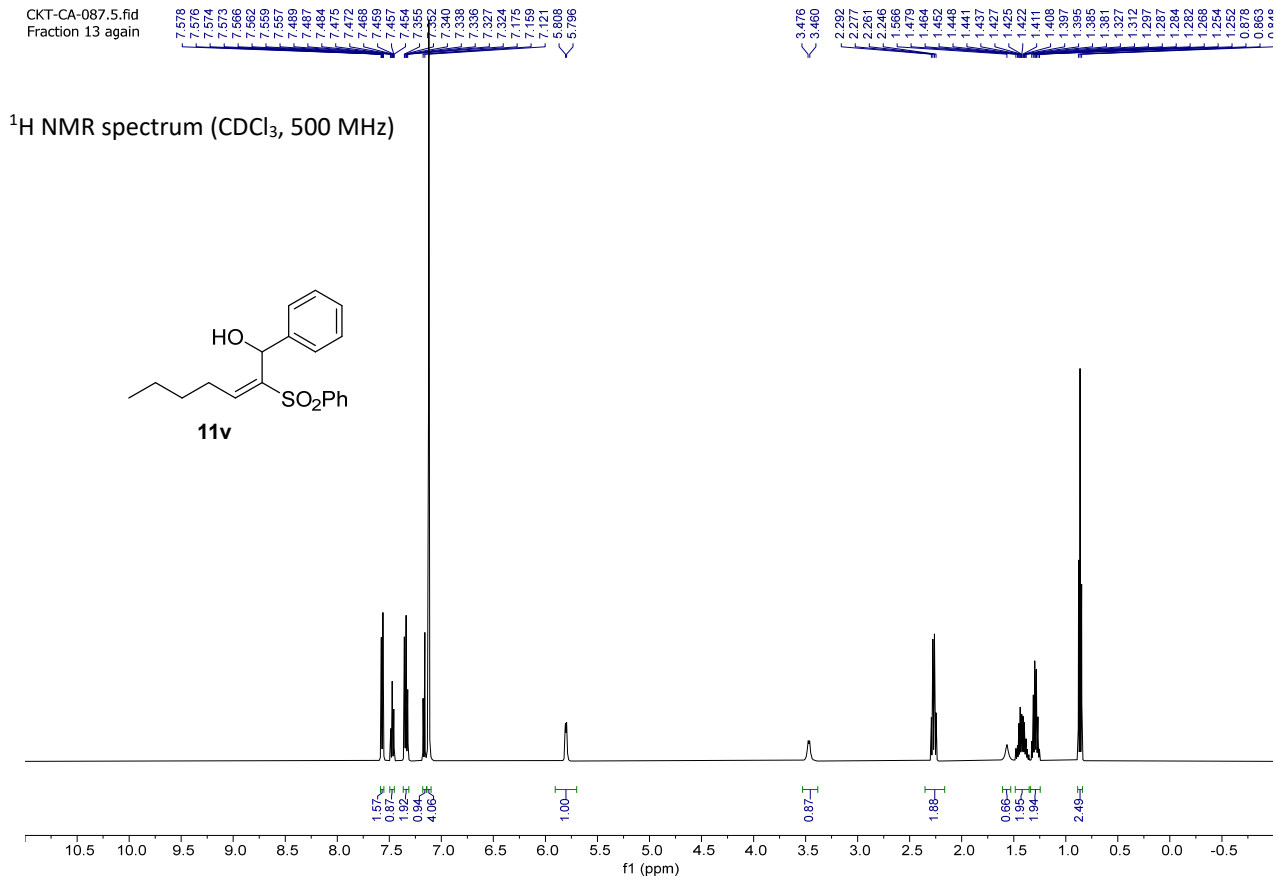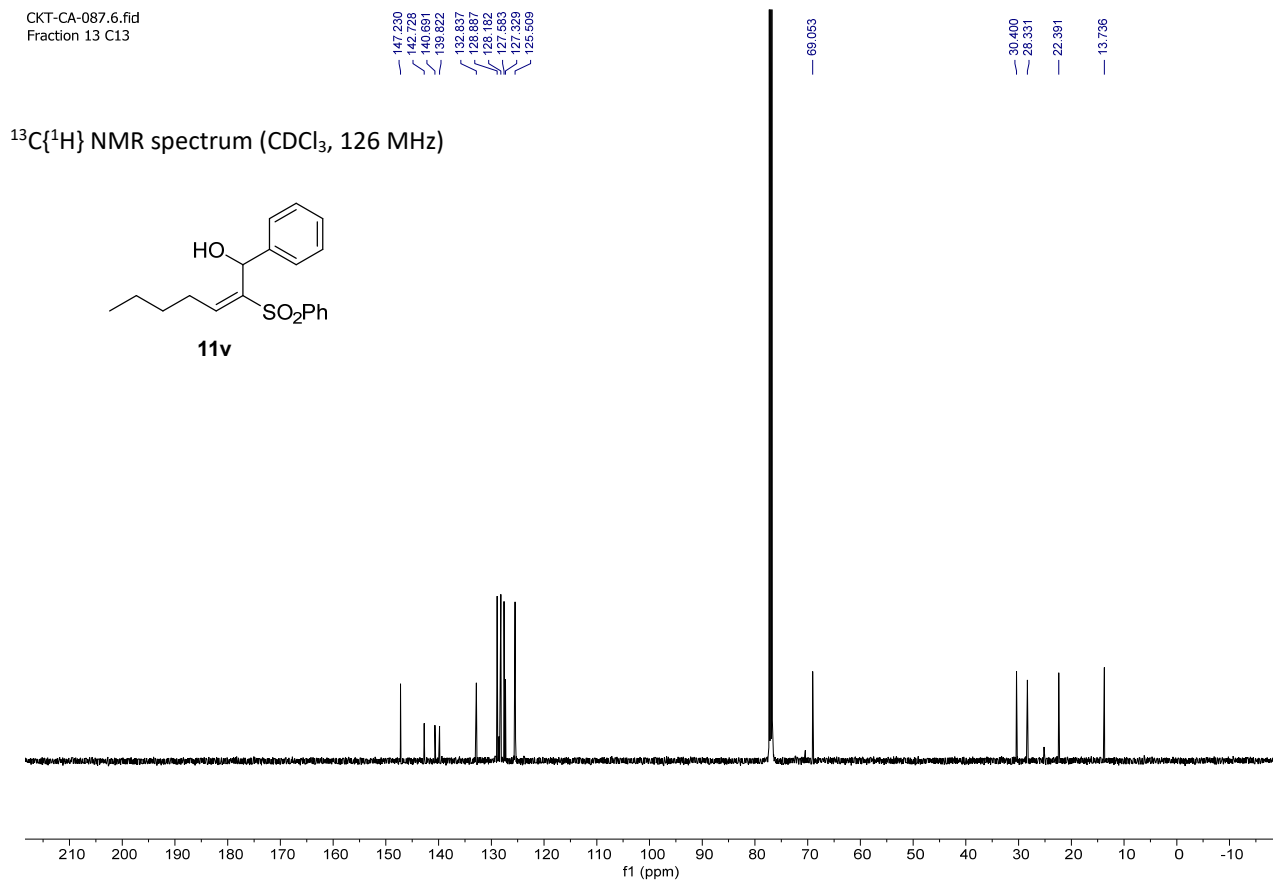



<sup>1</sup>H NMR spectrum (CDCl<sub>3</sub>, 500 MHz)

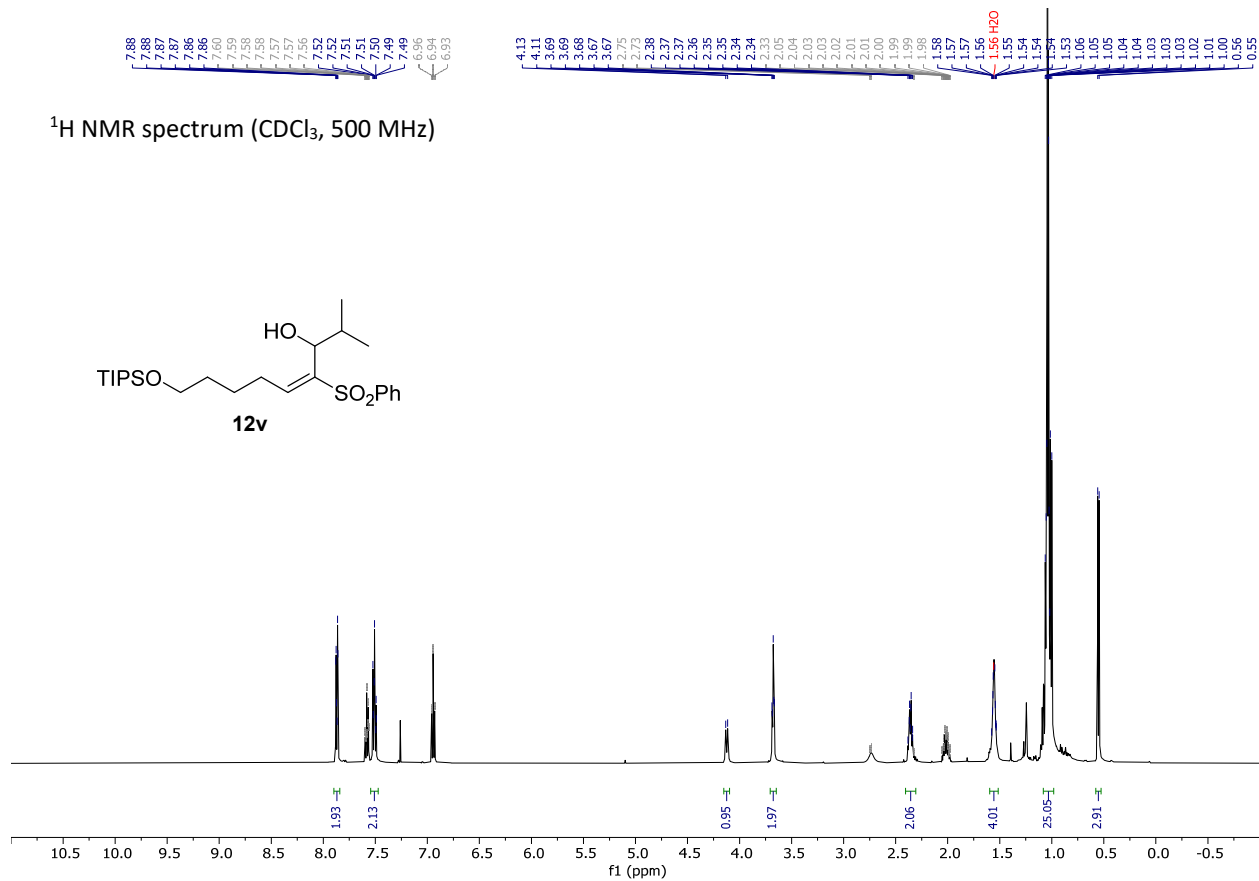

<sup>13</sup>C{<sup>1</sup>H} NMR spectrum (CDCl<sub>3</sub>, 126 MHz)

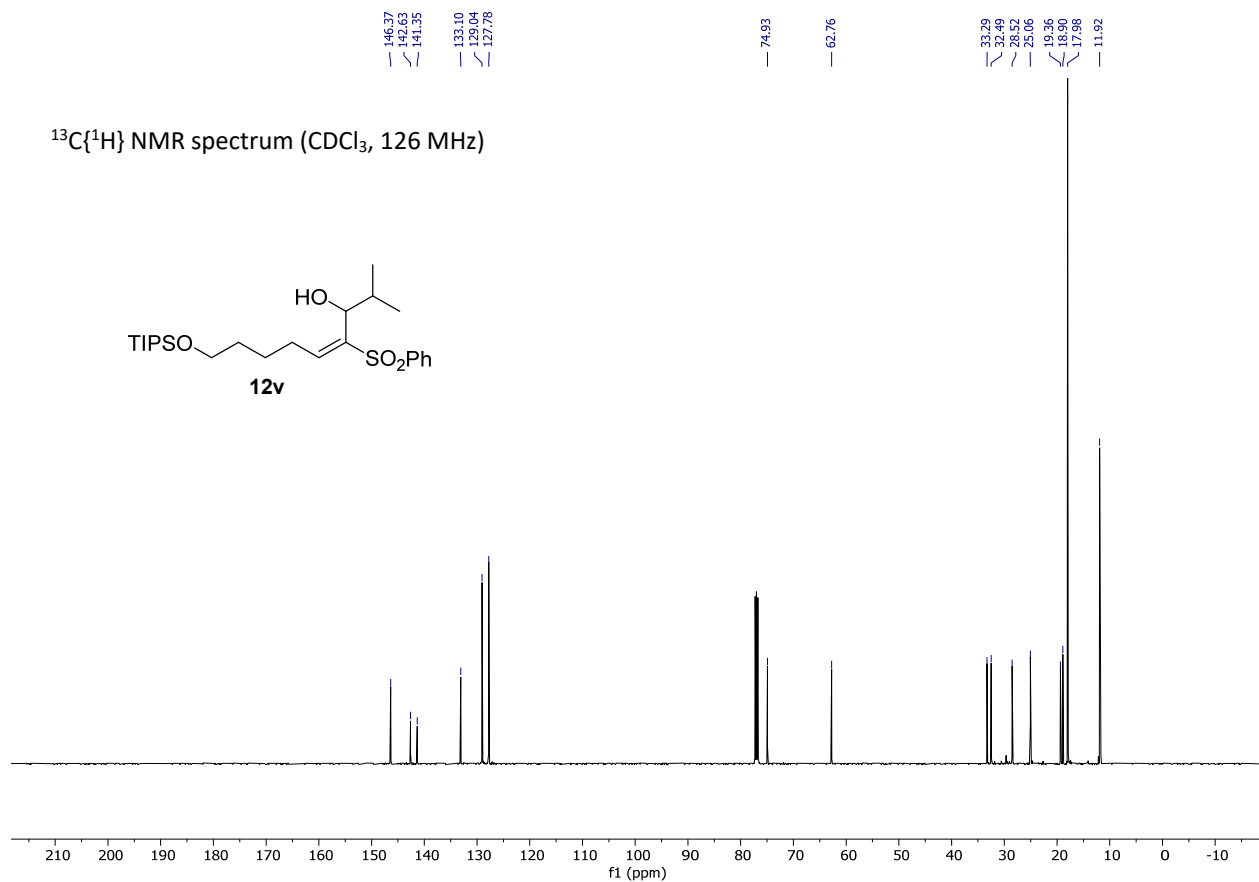

7.83 7.82 7.82 7.82 7.81 7.81 7.80 7.64 7.64 7.63 7.62 7.62 7.61 7.61 7.55 7.54 7.54 7.53 7.53 7.52 7.52 7.51 7.51 5.66 5.65 5.65 5.39 5.38 4.00 4.08 4.08 4.07 4.06 4.06 3.61 3.61 3.59 3.59 3.58 3.58 3.57 3.56 3.56 3.56 3.05 3.05 2.07 2.05 2.05 2.05 2.04 2.03 2.03 2.02 2.02 2.02 1.67 1.66 1.65 1.65 1.44 1.42 1.42 1.41 1.41 1.40 1.05 1.04 1.04 1.03 1.03 1.02 1.02 1.01 1.01 0.78 0.78 0.76

<sup>1</sup>H NMR spectrum (CDCl<sub>3</sub>, 500 MHz)

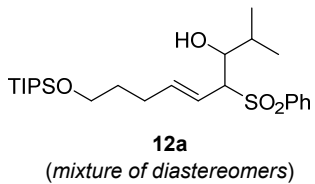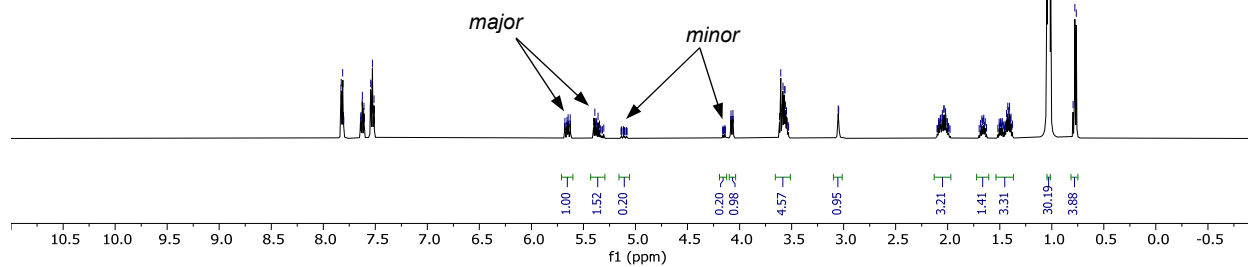

<sup>13</sup>C{<sup>1</sup>H} NMR spectrum (CDCl<sub>3</sub>, 126 MHz)

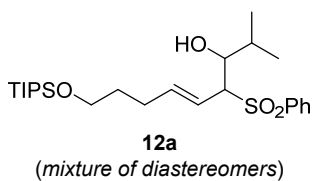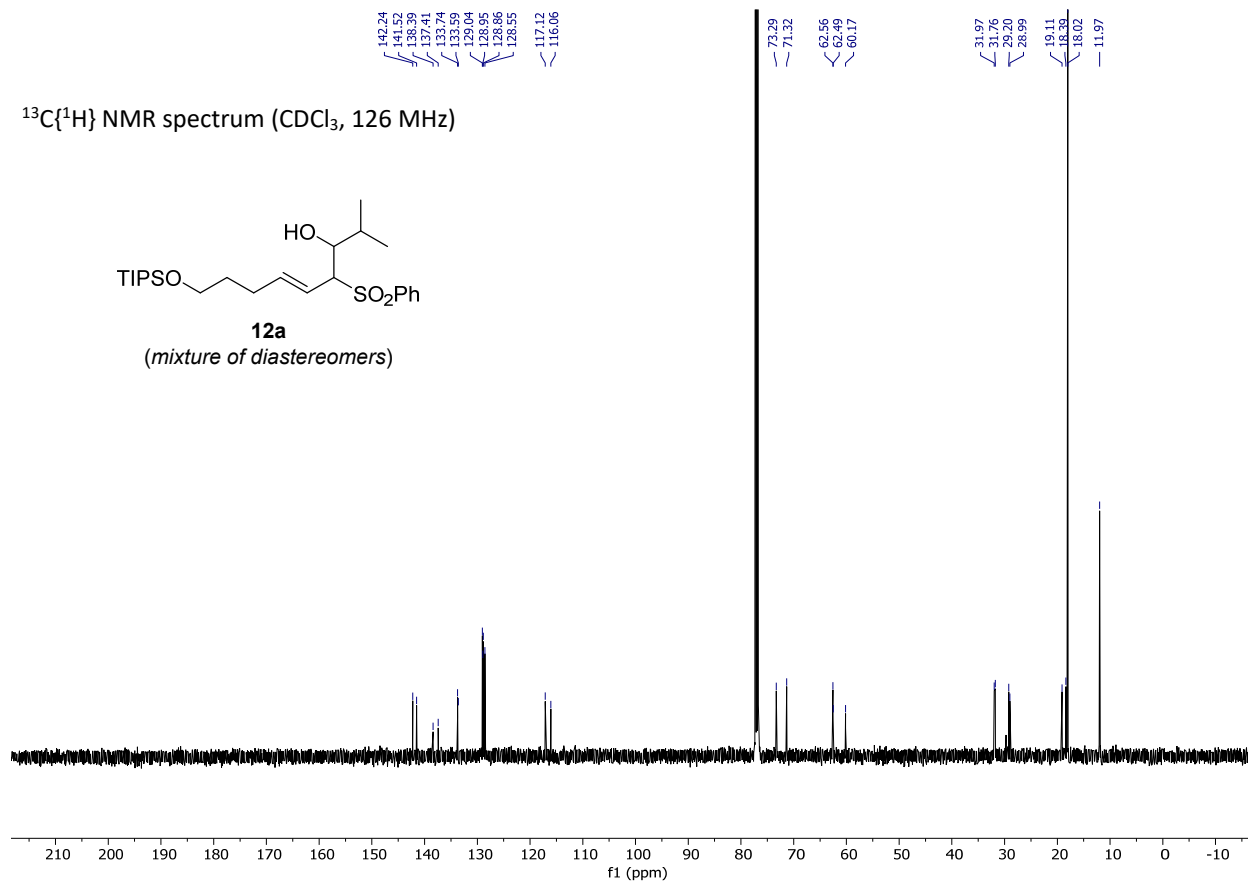

CKT-CA-092.2.fid  
Fraction 12

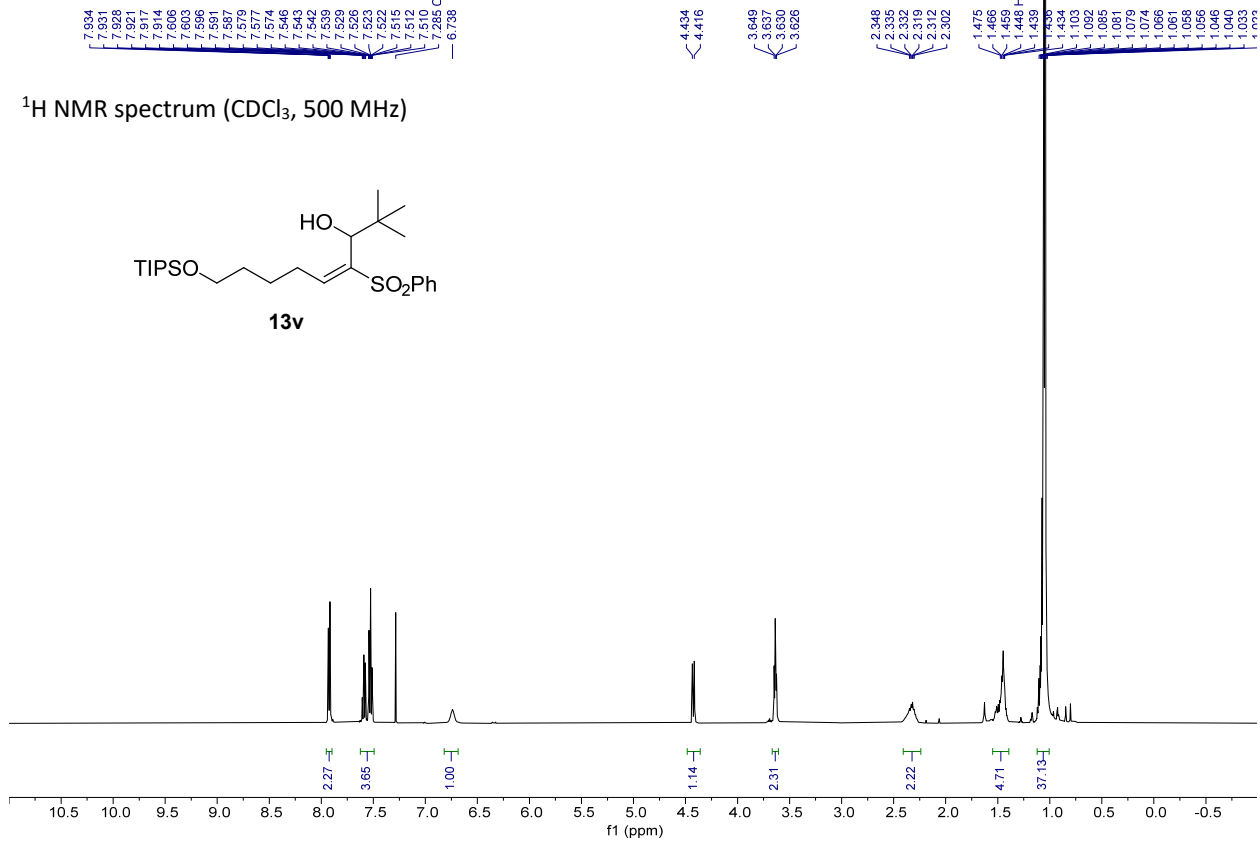

CKT-CA-092 F12.1.fid

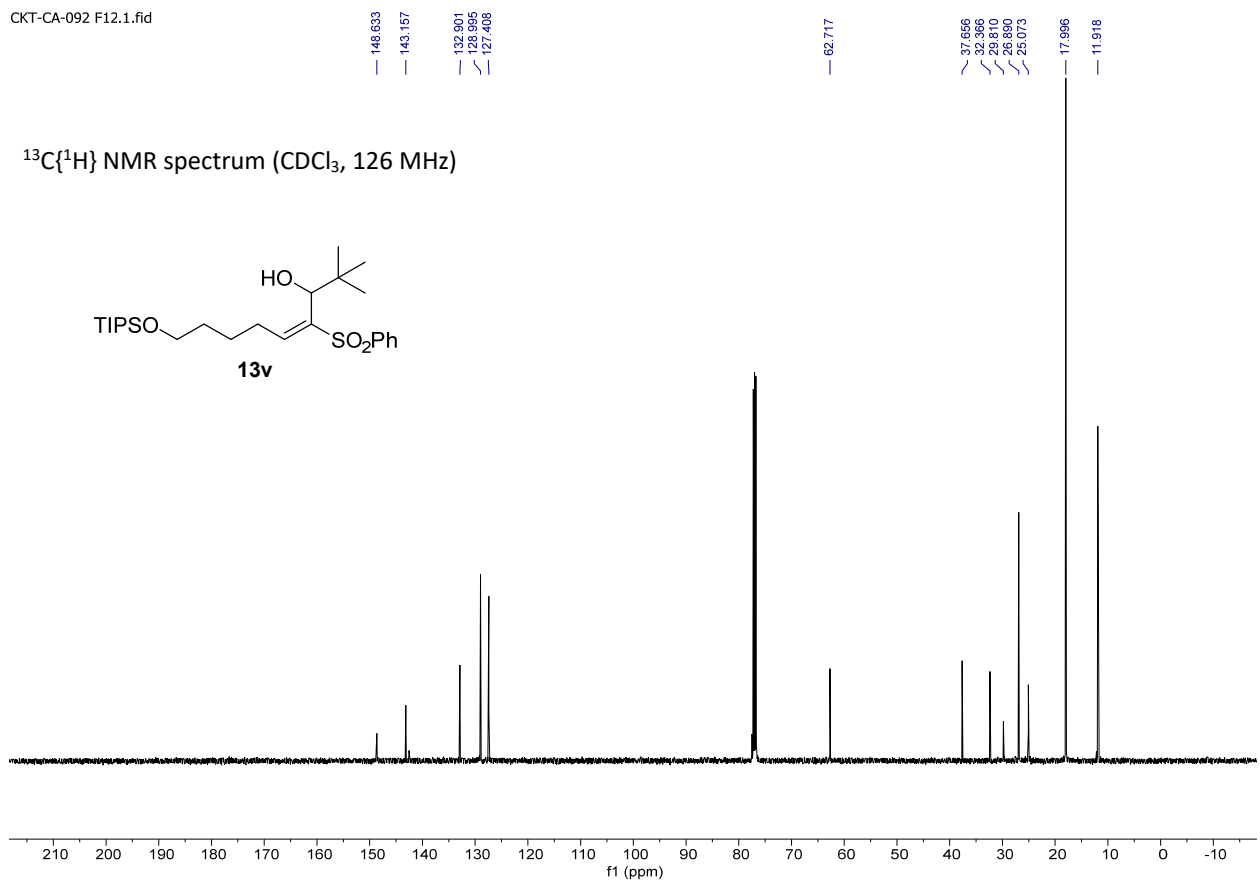

CKT-CA-093 F7-9 13C.10.fid  
 141.402 136.919 133.620 129.202 128.729 118.706 73.947 70.564 62.639 38.976 31.728 28.520 17.987 11.930

<sup>1</sup>H NMR spectrum (CDCl<sub>3</sub>, 500 MHz)

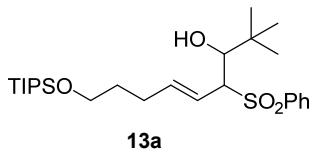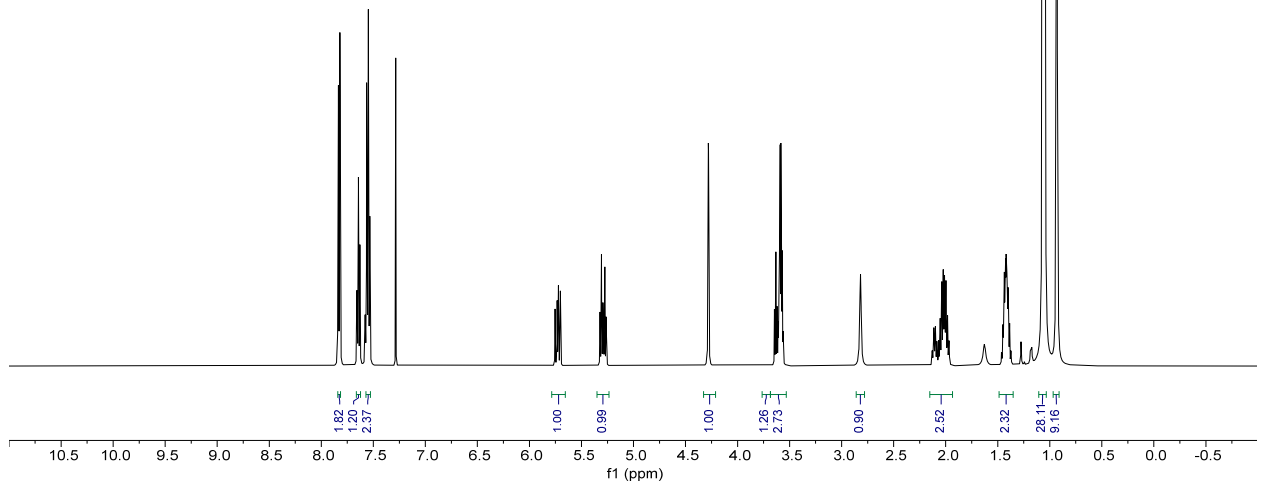

CKT-CA-093 F7-9 13C.10.fid

141.402  
 136.919  
 133.620  
 129.202  
 128.729  
 118.706

73.947  
 70.564  
 62.639

38.976  
 31.728  
 28.520

17.987  
 11.930

<sup>13</sup>C{<sup>1</sup>H} NMR spectrum (CDCl<sub>3</sub>, 126 MHz)

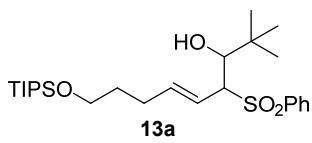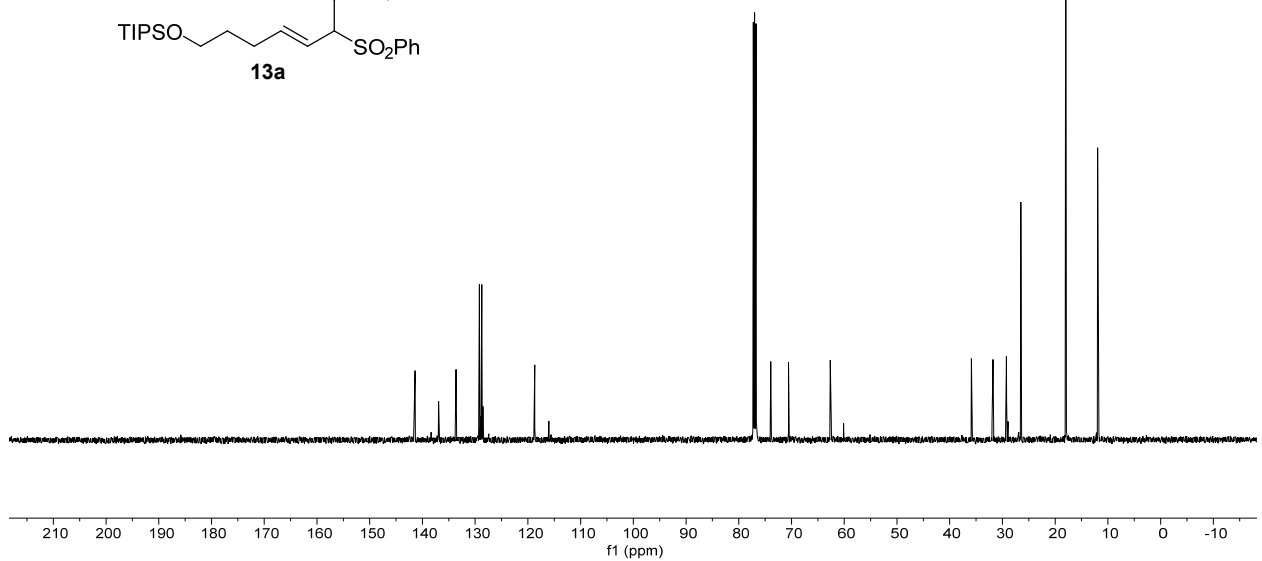

7.81 7.81 7.80 7.79 7.62 7.62 7.61 7.60 7.59 7.59 7.53 7.53 7.52 7.51 7.50 7.50 7.50 7.50 7.30 7.30 7.29 7.29 7.28 7.28 7.27 7.27 7.27 7.26 7.26 7.24 7.24 7.24 7.23 7.22 7.22 7.21 7.21 7.16 7.16 7.15 7.15 7.14 7.14 7.00 7.00 6.99 6.97 4.11 4.10 4.09 4.08 2.85 2.85 2.83 2.82 2.77 2.76 2.76 2.74 2.74 2.72 2.71 2.70 2.70 2.70 2.69 2.69 2.67 2.66 2.66 2.07 2.07 2.06 2.06 2.05 2.05 2.04 2.04 2.03 2.03 1.01 1.01 0.57 0.57

$^1\text{H}$  NMR spectrum ( $\text{CDCl}_3$ , 500 MHz)

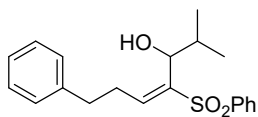

**14v**

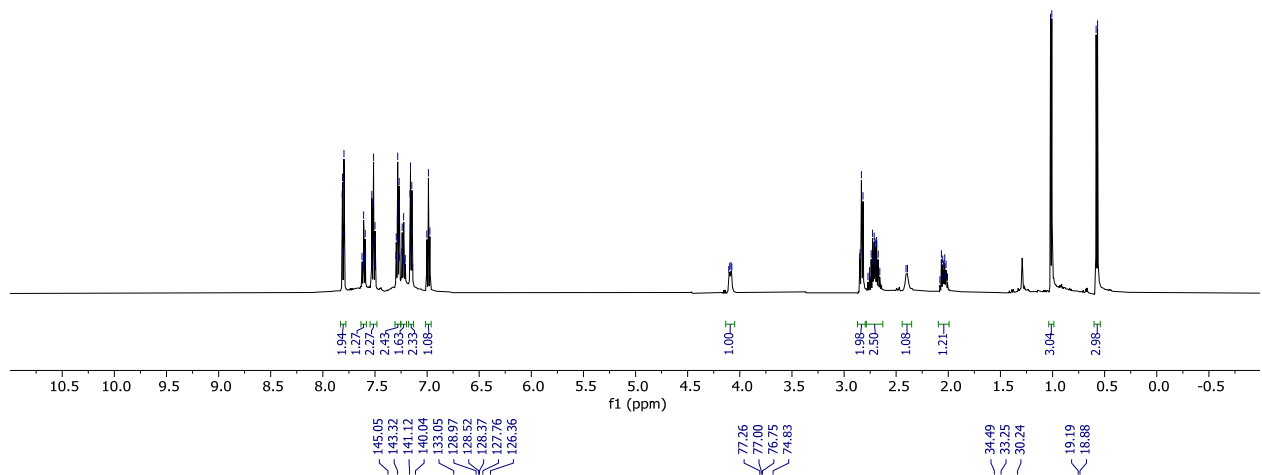

$^{13}\text{C}\{^1\text{H}\}$  NMR spectrum ( $\text{CDCl}_3$ , 126 MHz)

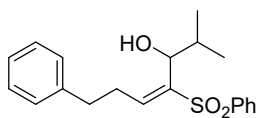

**14v**

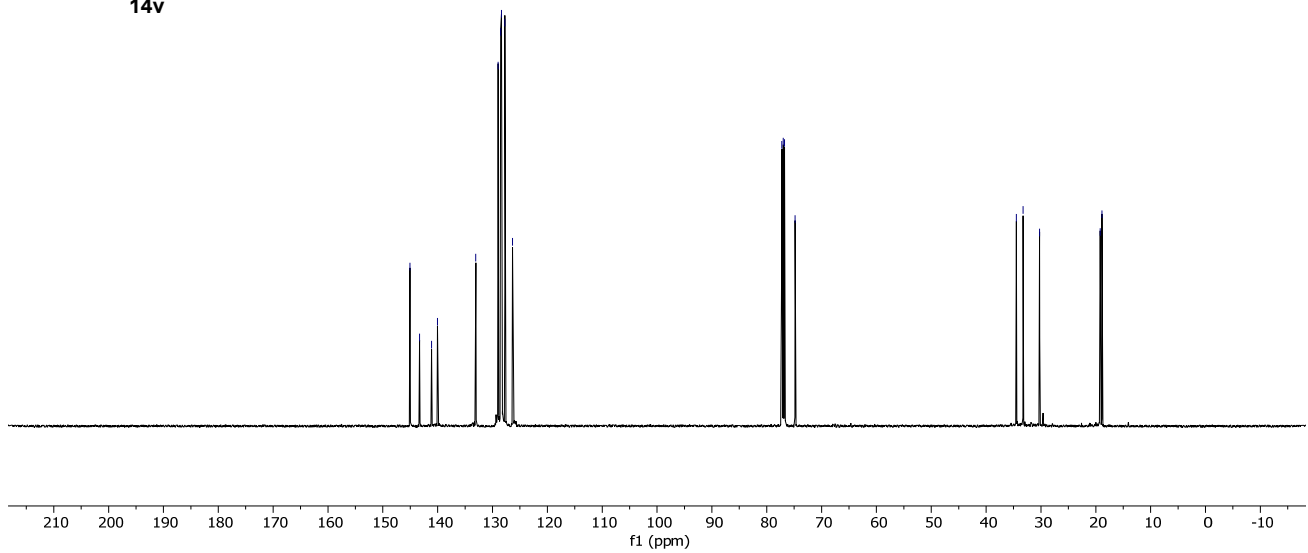

7.86 7.84 7.82 7.81 7.80 7.63 7.62 7.61 7.60 7.59 7.58 7.57 7.56 7.55 7.54 7.53 7.51 7.49 7.48 7.47 7.46 7.45 7.44 7.43 7.42 7.41 7.40 7.39 7.38 7.28 7.27 7.27 7.27 7.26 7.26 7.25 7.24 7.24 7.24 7.23 7.23 7.23 7.22 7.22 7.21 7.21 7.20 7.20 7.05 7.05 7.03 7.03 6.97 6.97 6.96 6.95 5.54 5.52 5.51 5.51 4.17 4.17 4.15 4.15 3.82 3.82 3.80 3.80 3.69 3.69 3.67 3.67 3.36 3.36 3.35 3.35 3.34 3.34 3.32 3.32 3.31 3.31 3.28 3.28 1.10 1.10 1.08 1.08 0.84 0.84 0.83 0.81

$^1\text{H}$  NMR spectrum ( $\text{CDCl}_3$ , 500 MHz)

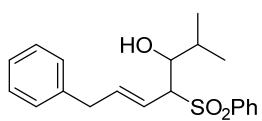

**14a**  
(mixture of diastereomers)

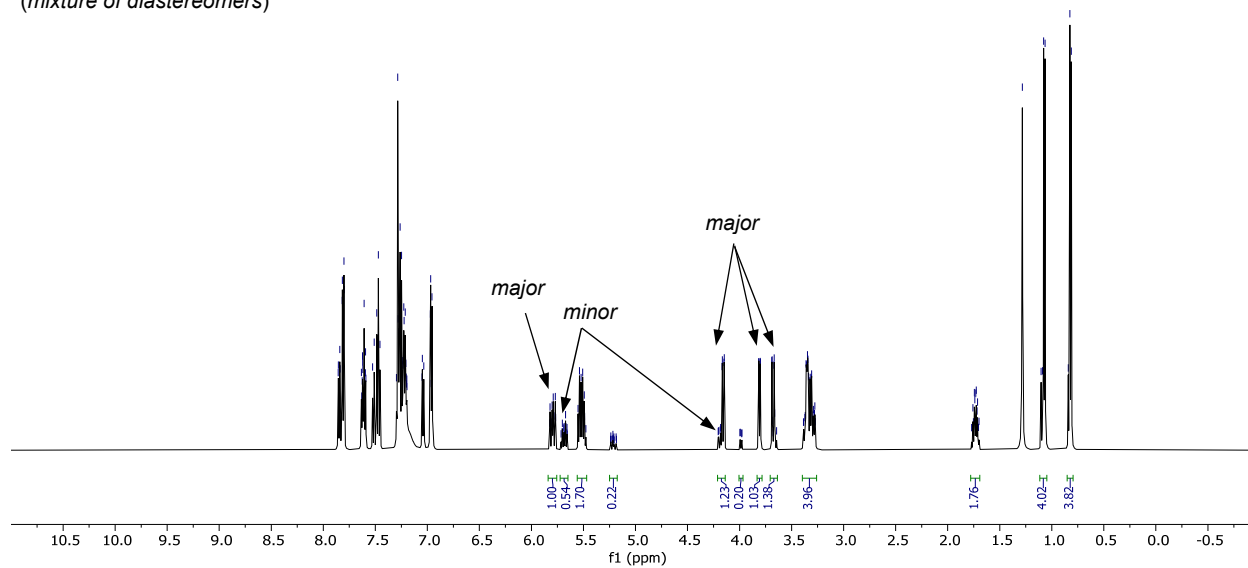

140.48 139.91 138.85 138.82 138.17 137.24 133.65 133.55 133.55 128.87 128.90 128.46 128.44 128.35 126.31 118.57 117.48

73.28 71.02

59.93

39.14 38.82

31.77

19.09 18.38

$^{13}\text{C}\{^1\text{H}\}$  NMR spectrum ( $\text{CDCl}_3$ , 126 MHz)

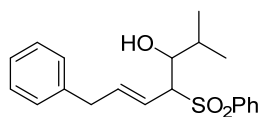

**14a**  
(mixture of diastereomers)

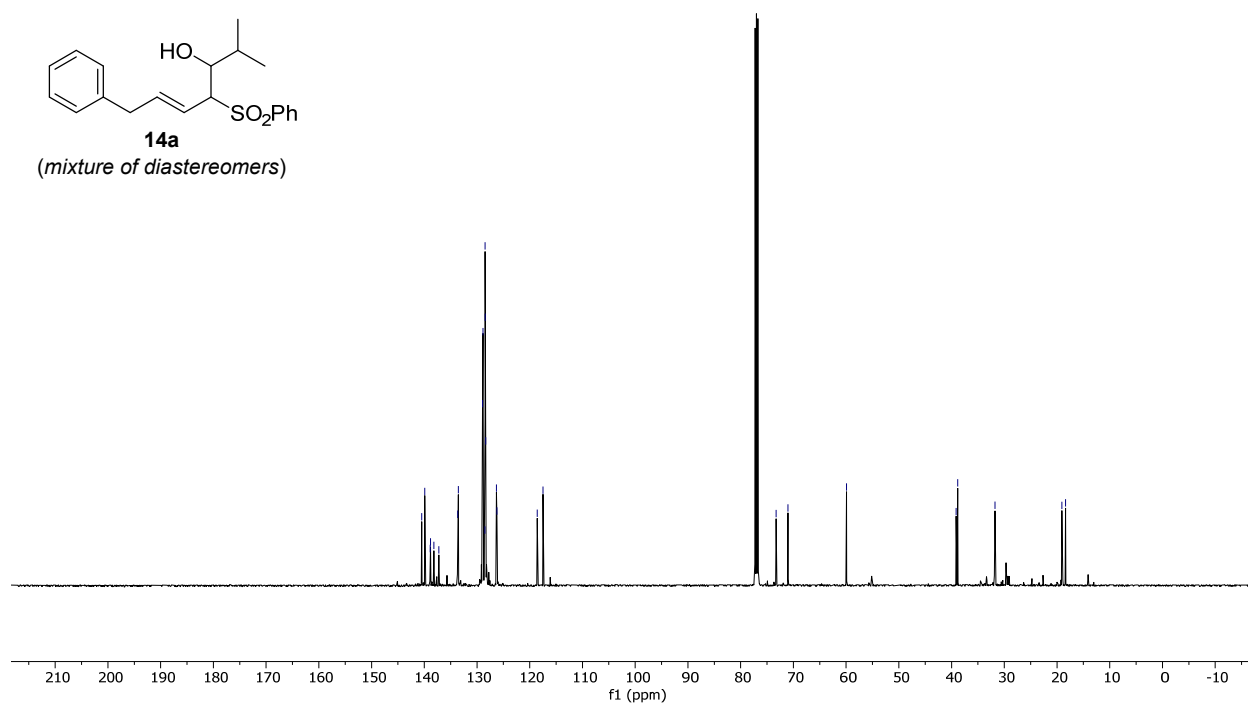

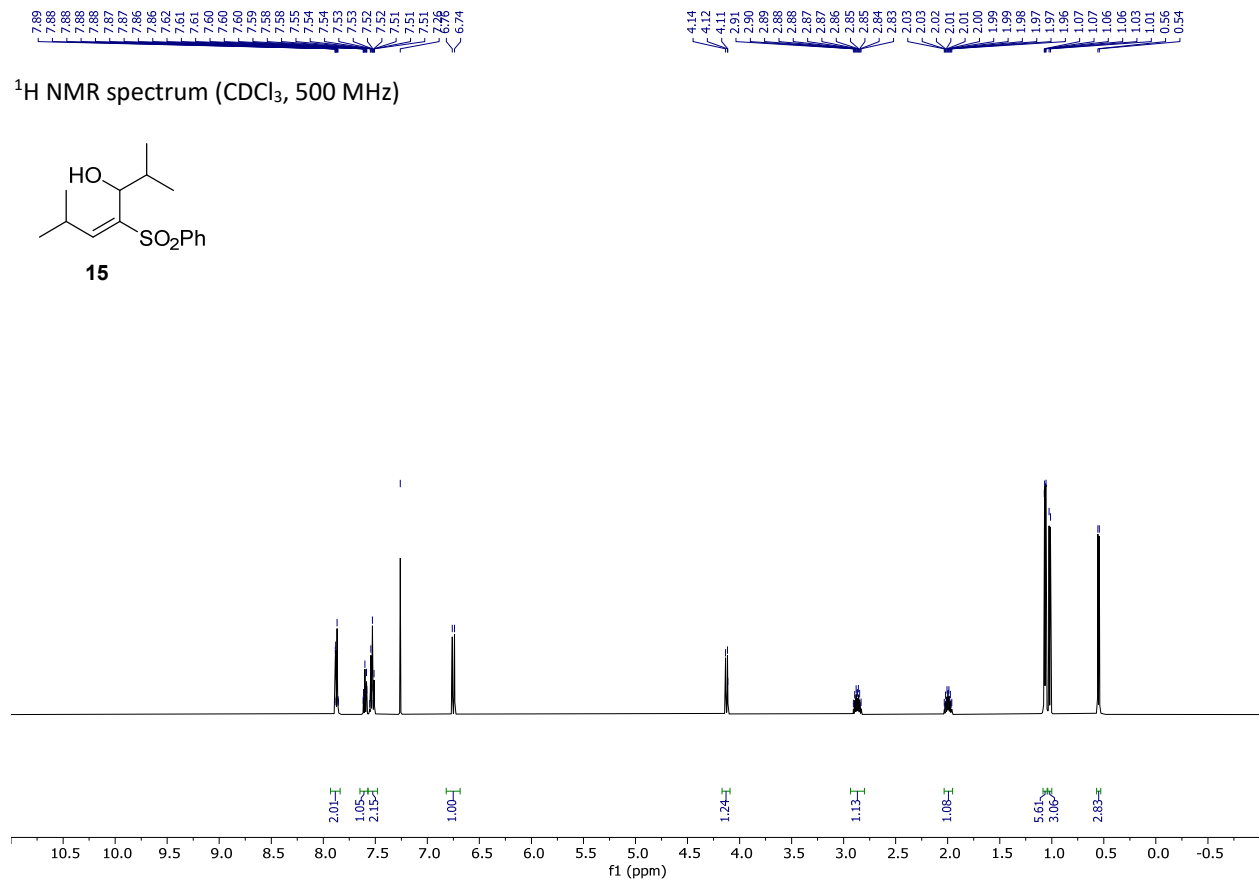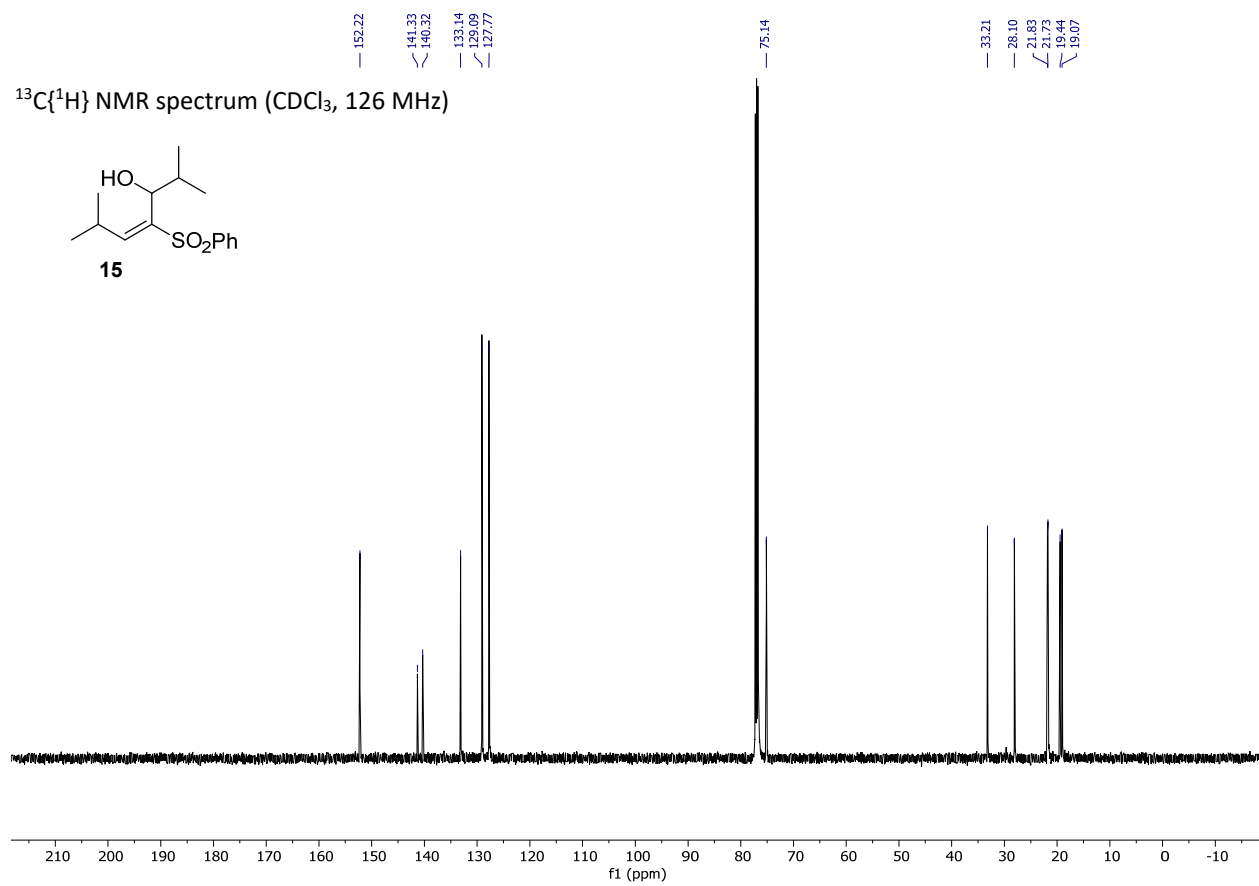

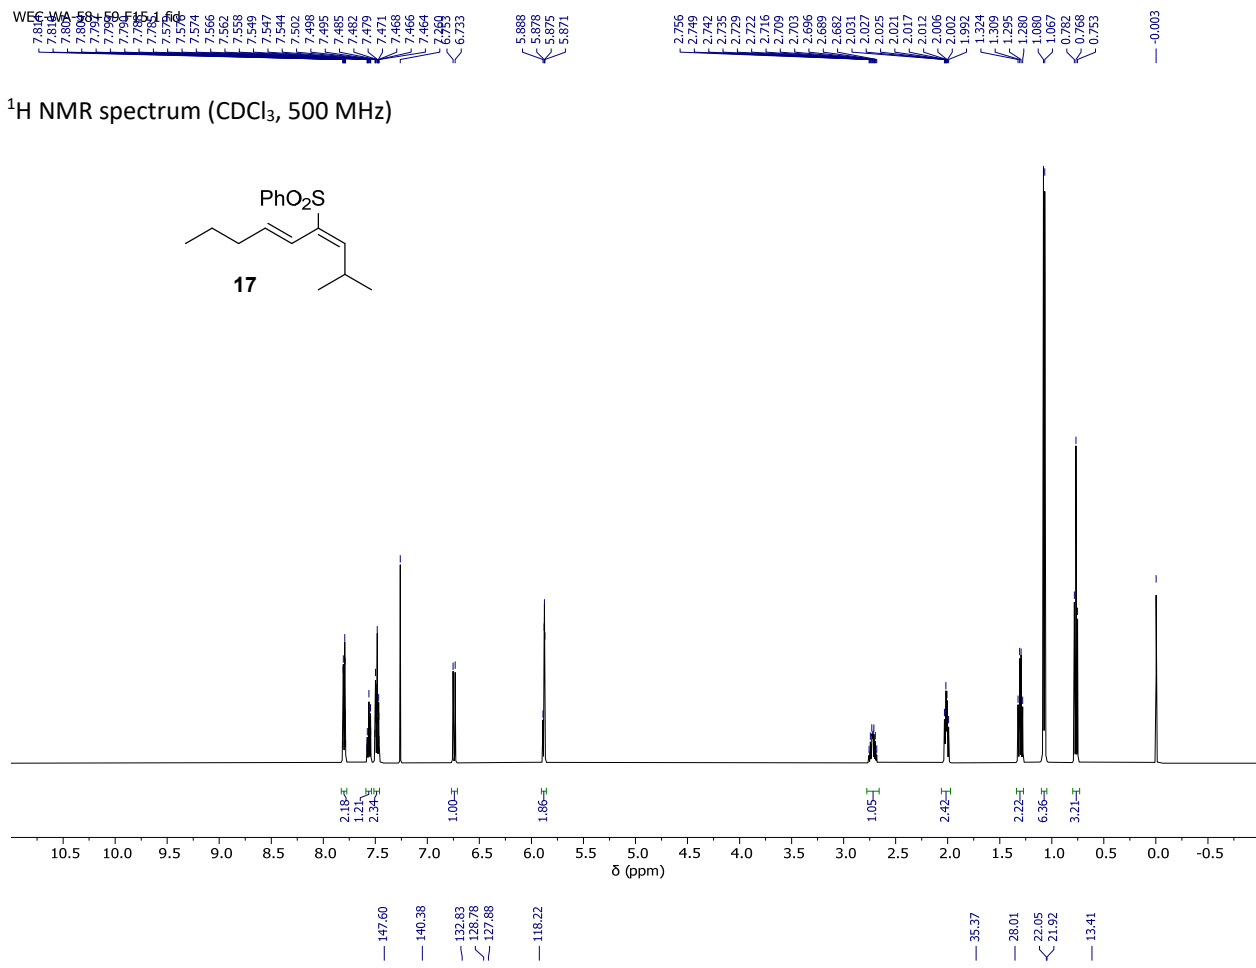

**<sup>13</sup>C{<sup>1</sup>H} NMR spectrum (CDCl<sub>3</sub>, 126 MHz)**

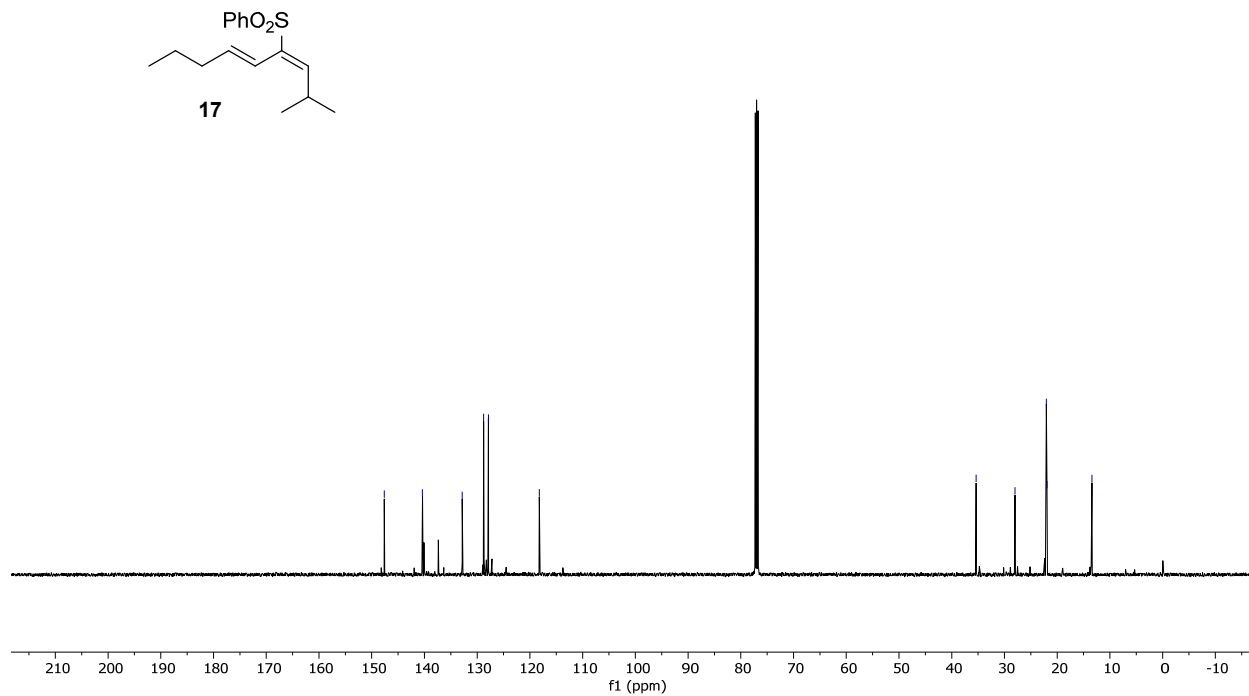



HSQC spectrum for compound **17** (CDCl<sub>3</sub>, 500 MHz)

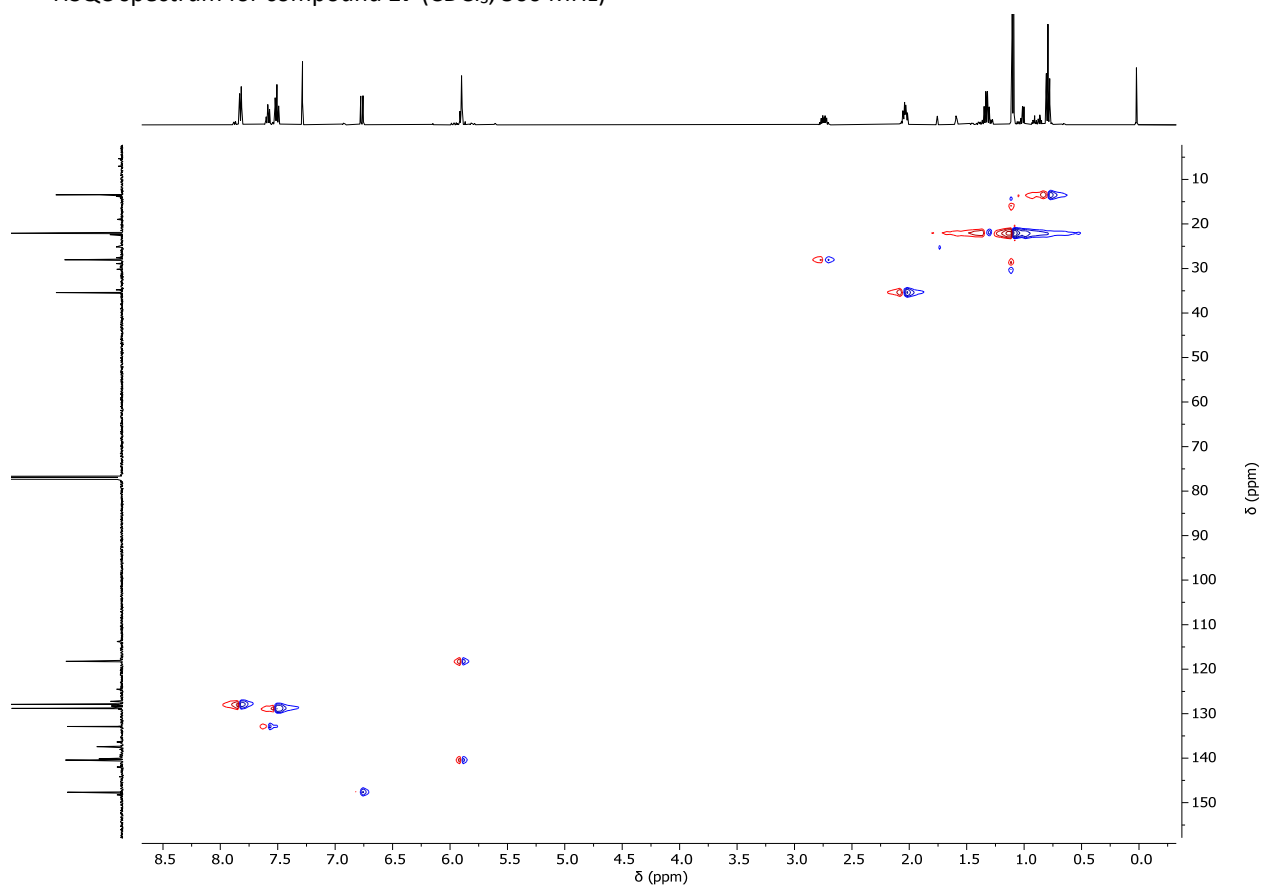

COSY spectrum for compound **17** (CDCl<sub>3</sub>, 500 MHz)

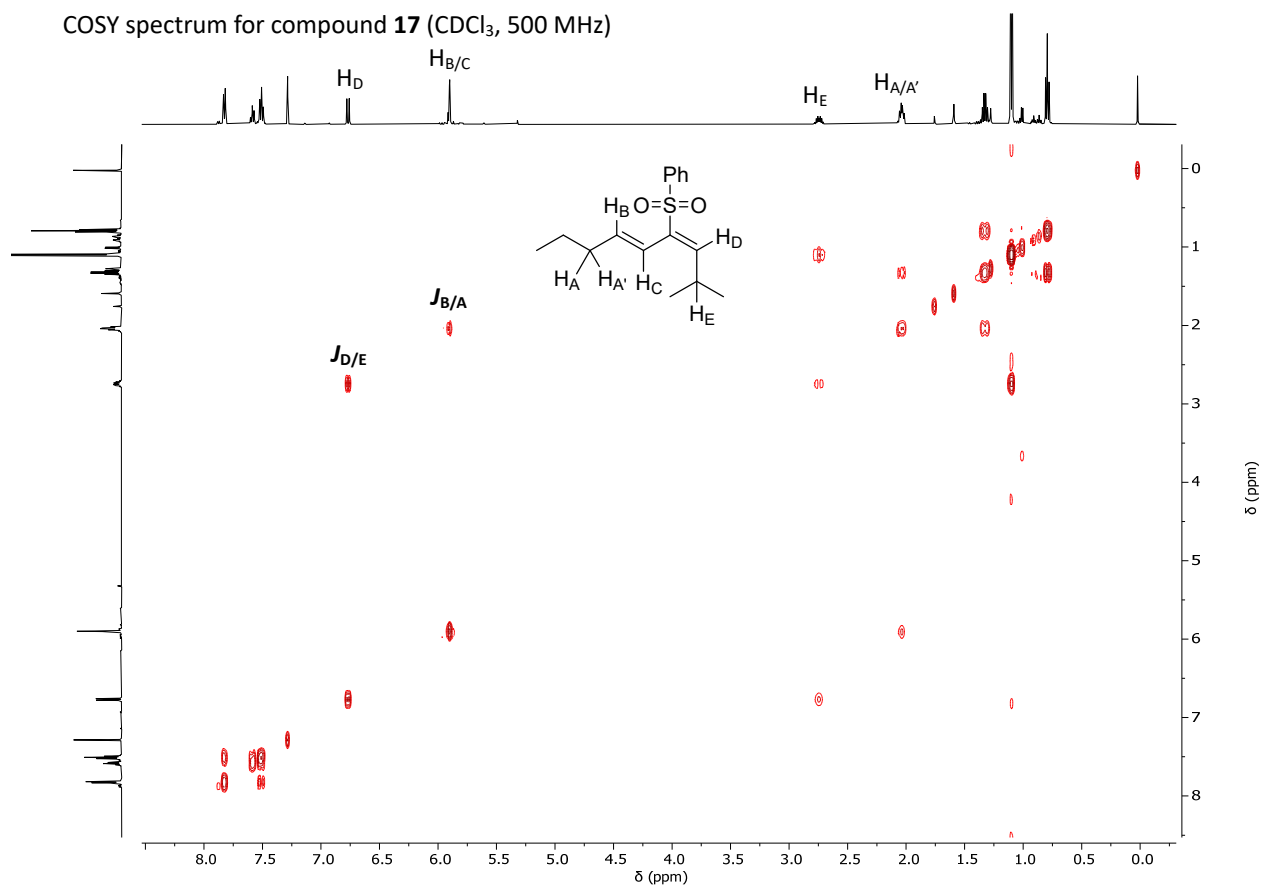

NOESY spectrum for compound **17** (CDCl<sub>3</sub>, 500 MHz)

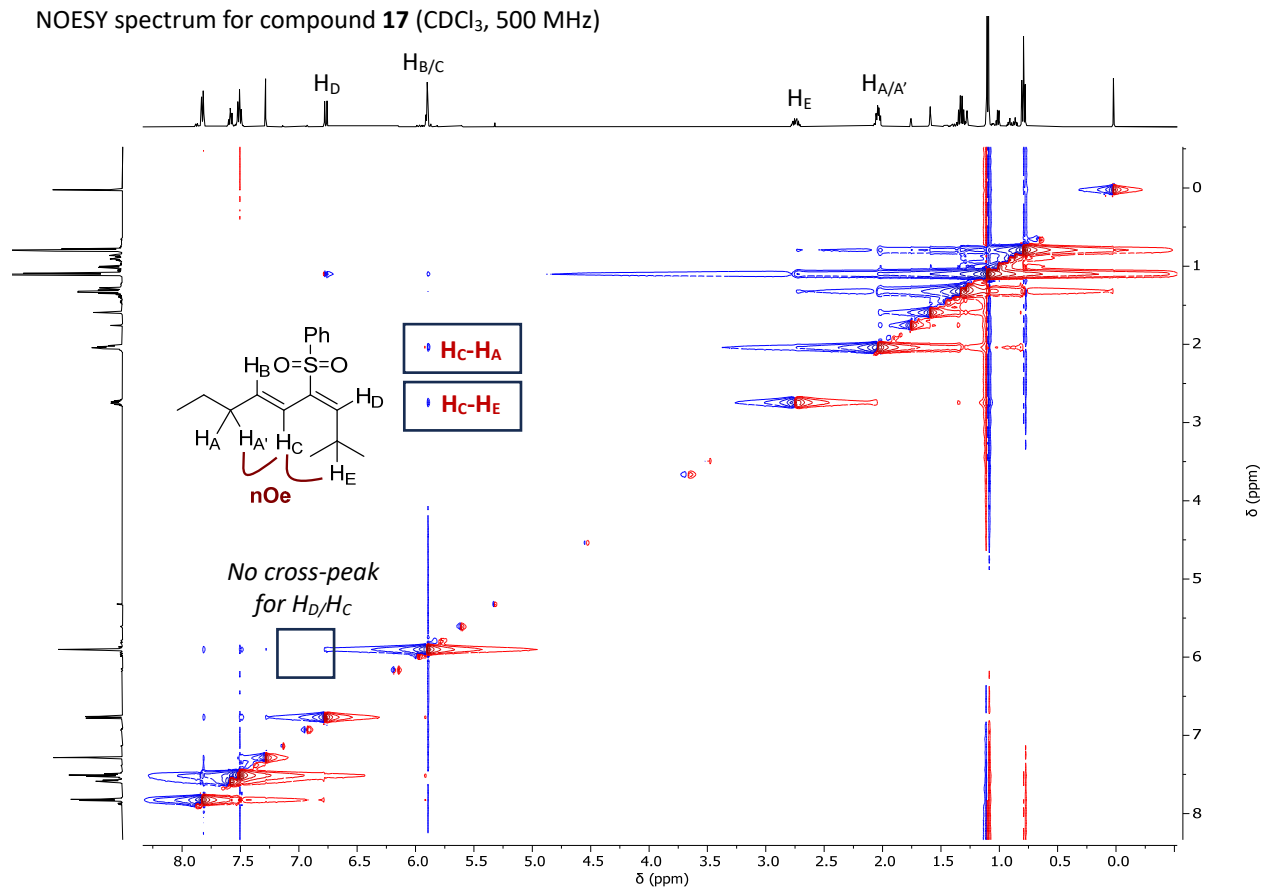

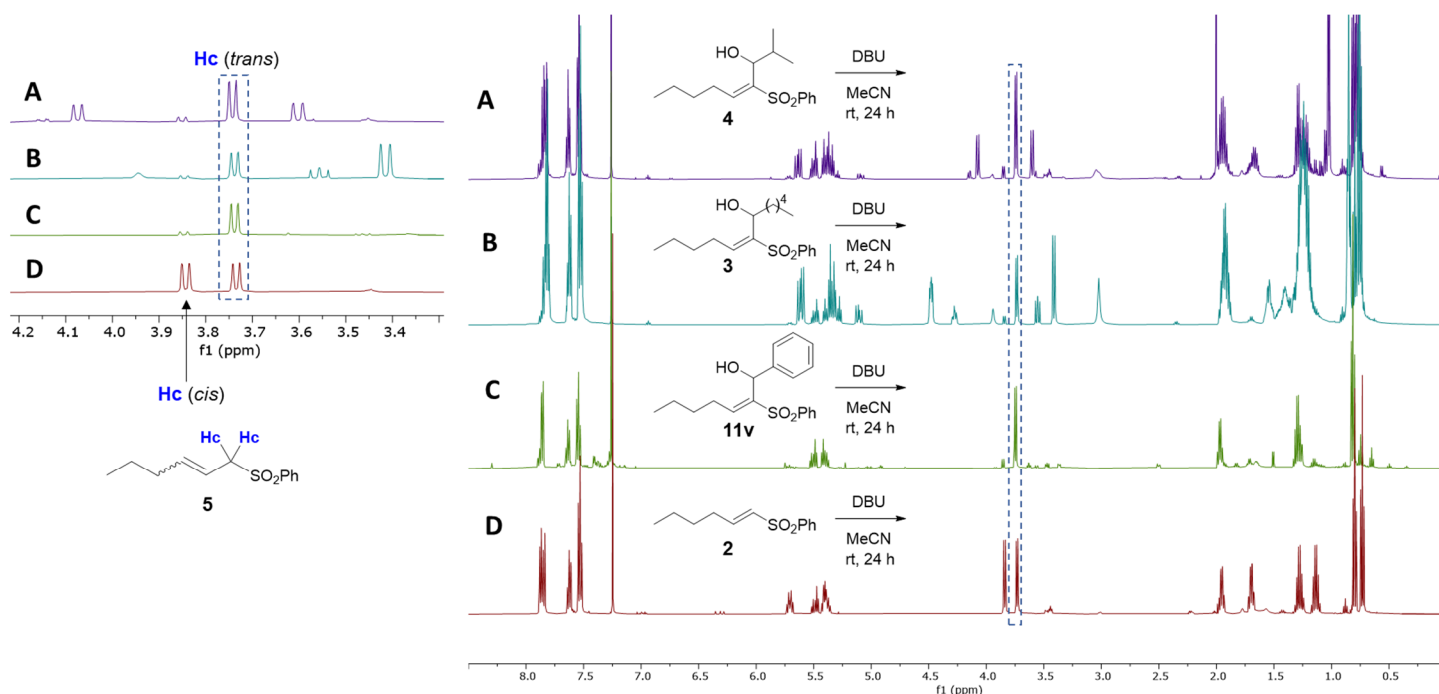

**Figure S1.** Comparison of crude product mixtures by  $^1\text{H}$  NMR obtained from the DBU isomerization of different vinylsulfone starting materials.  $\beta$ -hydroxysulfones **4** (top, spectrum A) and **3** (spectrum B) gave primarily the isomerized allylic sulfone product, whereas **11v** produced almost exclusively the C-C bond cleavage product **5** (spectrum C). All  $\beta$ -hydroxysulfones gave **5** with high *trans*-selectivity, whereas vinylsulfone **2** produced **5** as a  $\sim$ 1:1 *cis:trans* mixture (spectrum D).

**Table S1.** Tables of  $^1\text{H}$  NMR coupling constants for various beta-hydroxysulfones stereoisomers previously reported by Mase and coworkers<sup>1</sup> (left) and from our work (right). Across both data sets, a clear trend can be observed where the *major/erythro*-isomer displayed smaller coupling constants (0.9-1.5 Hz) than the *minor/threo*-isomer.

*erythro*

*threo*

| $\text{R}^1$ | $\text{R}^2$ |                | $J_{\text{XY}}$ (Hz) |
|--------------|--------------|----------------|----------------------|
| Ph           | <i>i</i> -Pr | <i>erythro</i> | 1.2                  |
|              |              | <i>threo</i>   | 8.6                  |
| Ph           | Et           | <i>erythro</i> | 1.2                  |
|              |              | <i>threo</i>   | 8.8                  |
| Me           | <i>i</i> -Pr | <i>erythro</i> | 1.4                  |
|              |              | <i>threo</i>   | 6.7                  |
| Me           | Bu           | <i>erythro</i> | 1.4                  |
|              |              | <i>threo</i>   | 6.7                  |
| Me           | Et           | <i>erythro</i> | 1.4                  |
|              |              | <i>threo</i>   | 6.7                  |

| $\text{R}^1$ | $\text{R}^2$   |              | $J_{\text{XY}}$ (Hz) |
|--------------|----------------|--------------|----------------------|
| Pr           | Me             | <i>major</i> | 1.5                  |
|              |                | <i>minor</i> | 8.6                  |
| Pr           | <i>n</i> -pent | <i>major</i> | 1.4                  |
|              |                | <i>minor</i> | 8.3                  |
| Pr           | <i>i</i> -Bu   | <i>major</i> | 1.3                  |
|              |                | <i>minor</i> | 8.4                  |
| Pr           | <i>i</i> -Pr   | <i>major</i> | 1.4                  |
|              |                | <i>minor</i> | 9.5                  |
| Pr           | <i>t</i> -Bu   | <i>major</i> | 0.9                  |
|              |                | <i>minor</i> | NA <sup>a</sup>      |

**Notes for Table:**  $^1\text{H}$  NMR spectra were acquired in  $\text{CDCl}_3$  as solvent. <sup>a</sup>Not available since only a single diastereomer was obtained as detected by NMR.

<sup>1</sup> Mase, N.; Watanabe, Y.; Toru, T.; Kakumoto, T.; Hagiwara, T. Diastereoselective Radical Hydrogenation of  $\alpha$ -(1-Hydroxyalkyl)vinyl Sulfoxides and Sulfones Controlled by Intramolecular Hydrogen Bonding. *J. Org. Chem.* **2000**, *65*, 7083-7090.
